# Supplementary material
Source: PubMed Central journal article supplement (PMC5539924)

# **Synthesis, Biological Evaluation and Molecular Modeling of 2-Hydroxyisoquinoline-1,3-dione Analogues as Inhibitors of HIV Reverse Transcriptase Associated Ribonuclease H and Polymerase**

*Jing Tang*<sup>†a</sup>, *Sanjeev Kumar V. Vernekar*<sup>†a</sup>, *Yue-Lei Chen*<sup>ξa</sup>, *Lena Miller*<sup>b</sup>, *Andrew D. Huber*<sup>c</sup>,  
*Nataliya Myshakina*<sup>d</sup>, *Stefan G. Sarafianos*<sup>c</sup>, *Michael A. Parniak*<sup>b</sup> and *Zhengqiang Wang*<sup>\*a</sup>

<sup>a</sup> Center for Drug Design, Academic Health Center, University of Minnesota, Minneapolis, MN 55455, USA

<sup>b</sup> Department of Microbiology & Molecular Genetics, University of Pittsburgh School of Medicine, Pittsburgh, PA 15219, USA

<sup>c</sup> Department of Molecular Microbiology and Immunology and Department of Biochemistry, University of Missouri School of Medicine, Christopher S. Bond Life Sciences Center, Columbia, MO 65211, USA

<sup>d</sup> Department of Natural Science, Chatham University, 1 Woodland Road, Pittsburgh, PA, 15232, USA

## Table of Contents

|                                                  |        |
|--------------------------------------------------|--------|
| Additional docking to NNRTI binding pocket       | S2     |
| LID for best docked poses at RNase H active site | S2-S4  |
| NMR spectra for final compounds                  | S5-S34 |

## Additional docking to NNRTI binding pocket

| PDB Structure | Co-crystallized NNRTI | Compound <b>8c</b> |                                | Compound <b>9c</b> |                                |
|---------------|-----------------------|--------------------|--------------------------------|--------------------|--------------------------------|
|               |                       | Docking score      | Main Side Chain Contacts       | Docking score      | Side Chain Contacts            |
| 3LP1          | Nevirapine            | -8.32              |                                | -7.44              |                                |
| 3V81          | Nevirapine            | -8.65              |                                | -7.24              |                                |
| 1KLM          | Delavirdine           | -9.64              | Asn103, Tyr181, Tyr188, Trp229 | -9.91              | Asn103, Tyr181, Tyr188, Trp229 |
| 2YNG          | GSK560                | -9.38              |                                | -9.78              |                                |

## LID for best docked poses at RNase H active site

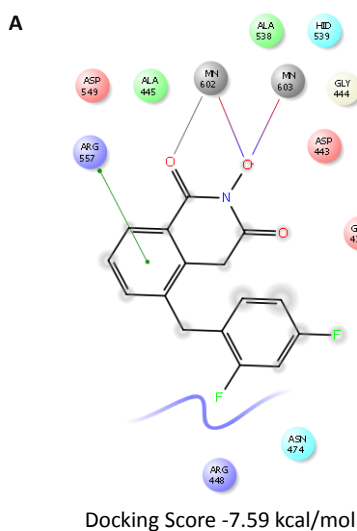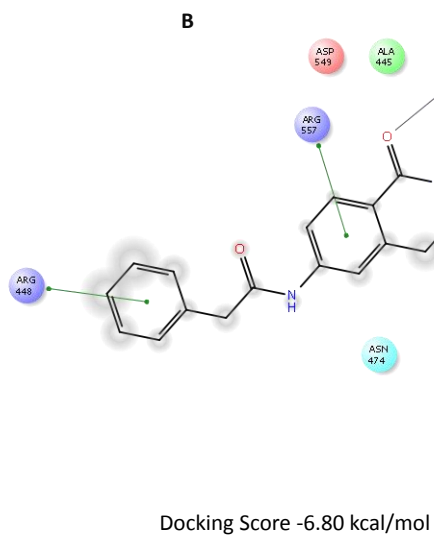

**Fig. S1.** Ligand Interaction Diagram for best poses of **8c** and **9c** docked into RNase H active center: A) Compound **8c** B) Compound **9c**; LID legend: red – charged (negative) residues; blue – charged (positive) residues; cyan – polar residues; green – hydrophobic residue.

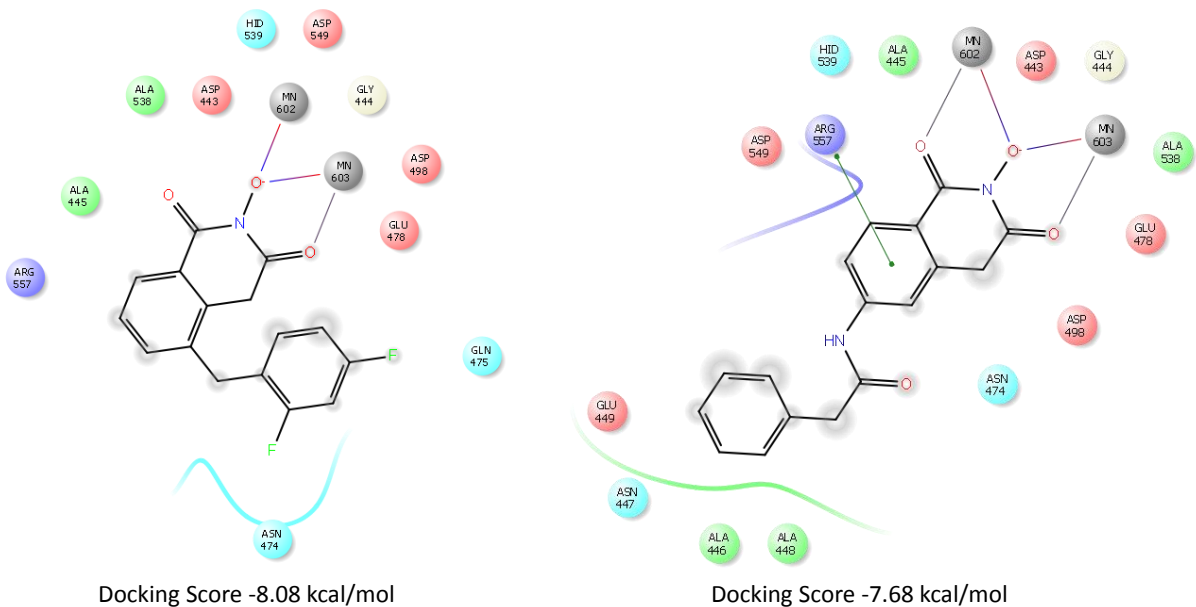

**Fig. S2.** Ligand Interaction Diagram for best poses of **8c** and **9c** docked into RNase H active center with R448A mutation: A) Compound **8c** B) Compound **9c**; LID legend: red – charged (negative) residues; blue – charged (positive) residues; cyan – polar residues; green – hydrophobic residue.

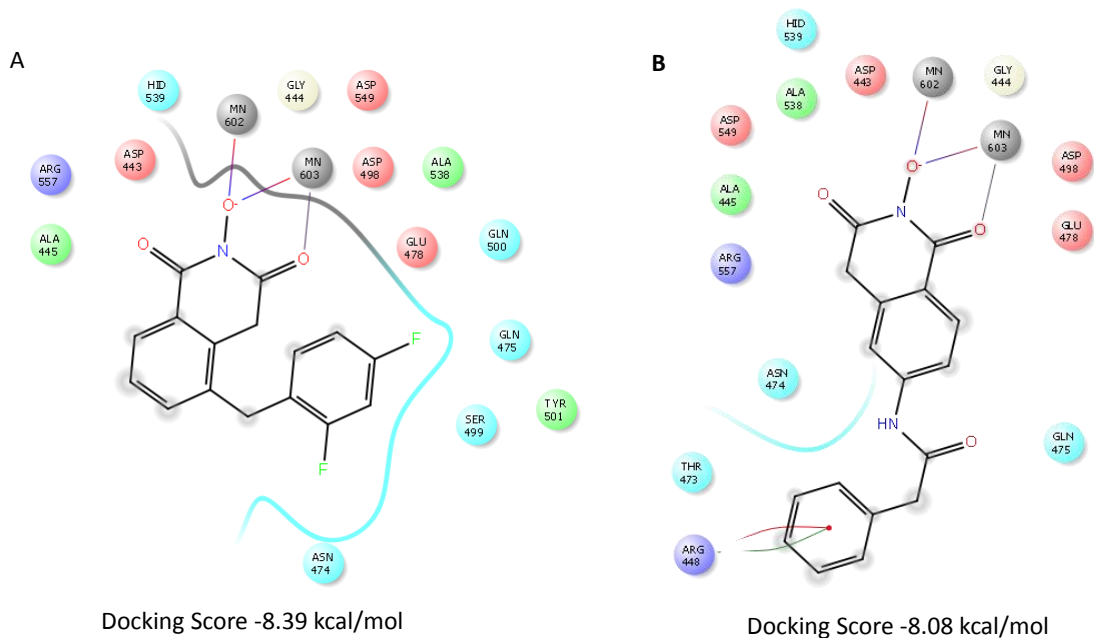

**Fig. S3.** Ligand Interaction Diagram for best poses of **8c** and **9c** docked into RNase H active center with flexible Arg448 side chain: A) Compound **8c** B) Compound **9c**; LID legend: red – charged (negative) residues; blue – charged (positive) residues; cyan – polar residues; green – hydrophobic residue.

sv-7-269-carb

Sample Name:  
sv-7-269-carb  
Data Collected on:  
nmr6003-vnmrs600  
Archive directory:  
/data/sverneka  
Sample directory:  
20150323\_sv-7-269-carb\_01  
FidFile: sv-7-269-carb\_PROTON\_01

Pulse Sequence: PROTON (s2pul)  
Solvent: dmsd  
Data collected on: Mar 23 2015

Temp. 25.0 C / 298.1 K  
Operator: sverneka

Relax. delay 1.000 sec  
Pulse 45.0 degrees  
Acq. time 1.704 sec  
Width 9615.4 Hz  
512 repetitions  
OBSERVE H1, 599.6555207 MHz  
DATA PROCESSING  
FT size 32768  
Total time 23 min

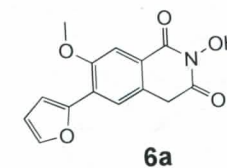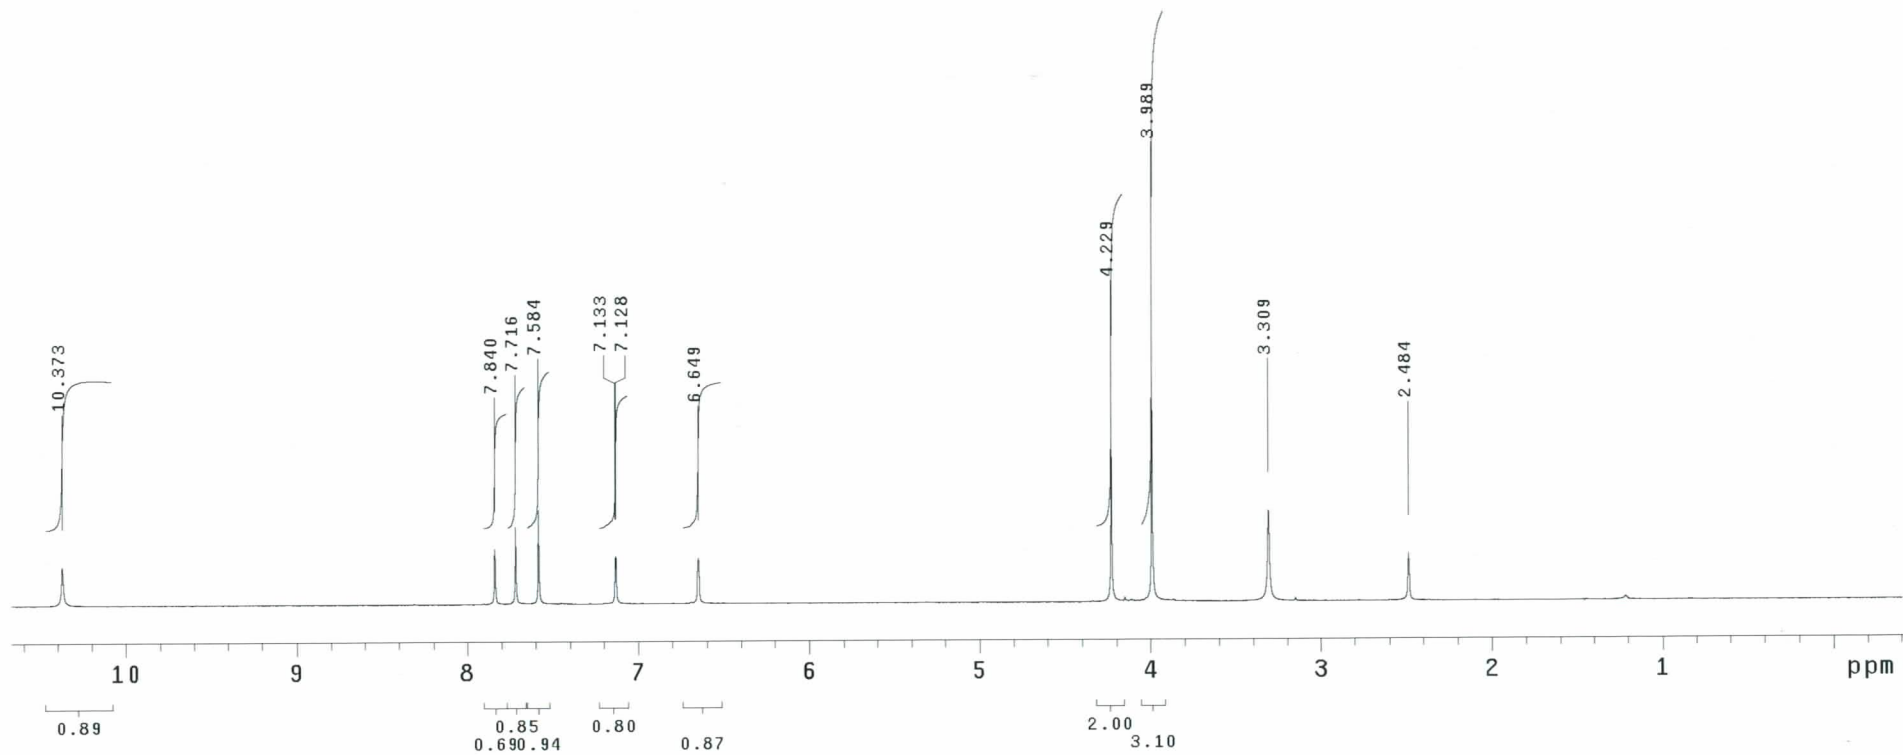

sv-7-269-carb

Sample Name:  
sv-7-269-carb  
Data Collected on:  
nmr6003-vnmrs600  
Archive directory:  
/data/sverneka  
Sample directory:  
20150323\_sv-7-269-carb\_01  
FidFile: sv-7-269-carb\_CARBON\_01

Pulse Sequence: CARBON (s2pu1)  
Solvent: dmsd  
Data collected on: Mar 23 2015

Temp. 25.0 C / 298.1 K  
Operator: sverneka

Relax. delay 1.000 sec  
Pulse 45.0 degrees  
Acq. time 0.865 sec  
Width 37878.8 Hz  
25000 repetitions  
OBSERVE C13, 150.7835006 MHz  
DECOUPLE H1, 599.6585190 MHz  
Power 43 dB  
continuously on  
WALTZ-16 modulated  
DATA PROCESSING  
Line broadening 0.5 Hz  
FT size 65536  
Total time 12 hr, 57 min

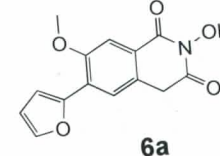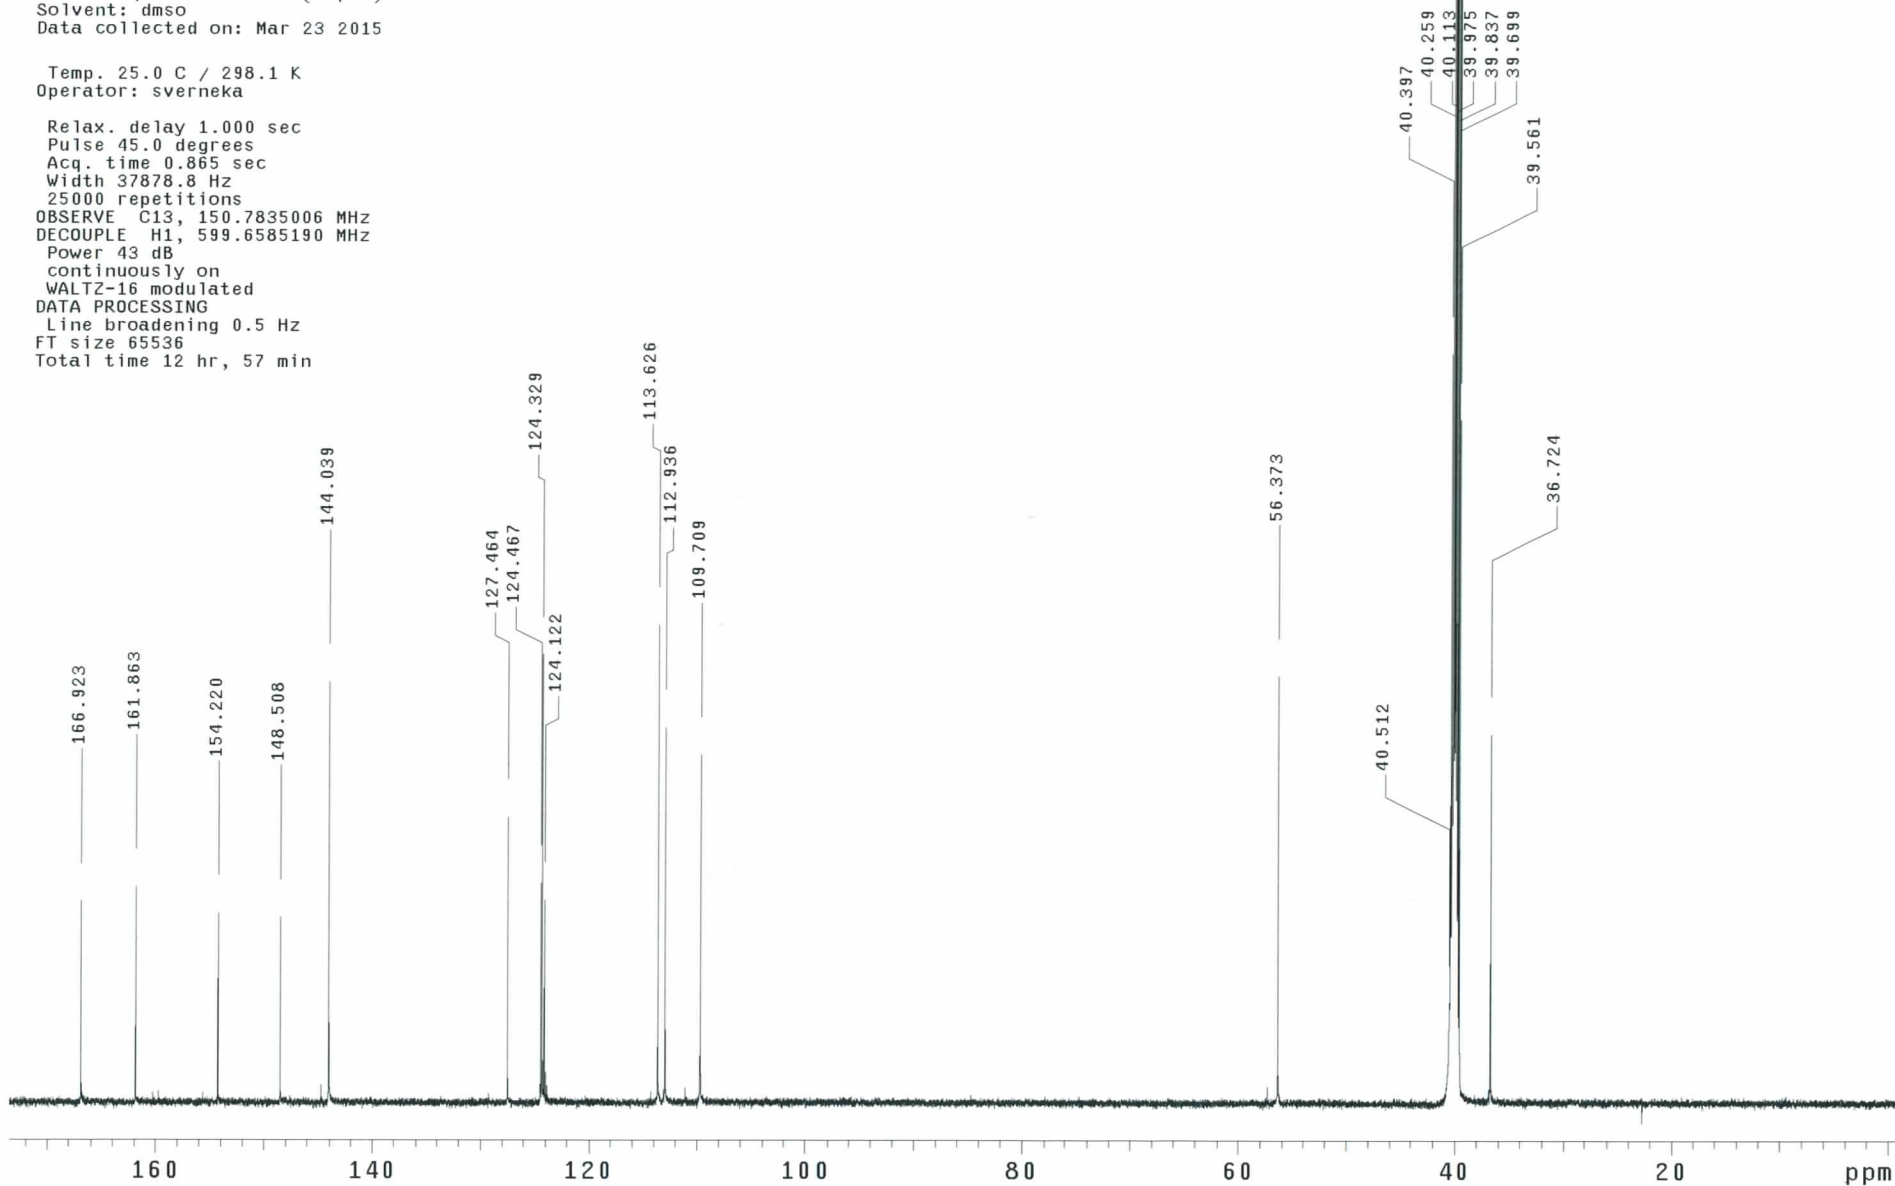

sv-7-263-carb

Sample Name:  
sv-7-263-carb  
Data Collected on:  
nmr6003-vnmrs600  
Archive directory:  
/data/sverneka  
Sample directory:  
20150326\_sv-7-263-carb\_01  
FidFile: sv-7-263-carb\_PROTON\_02

Pulse Sequence: PROTON (s2pu1)  
Solvent: dms0  
Data collected on: Mar 27 2015

Temp. 25.0 C / 298.1 K  
Operator: sverneka

Relax. delay 1.000 sec  
Pulse 45.0 degrees  
Acq. time 1.704 sec  
Width 9615.4 Hz  
64 repetitions  
OBSERVE H1, 599.6555207 MHz  
DATA PROCESSING  
FT size 32768  
Total time 2 min 53 sec

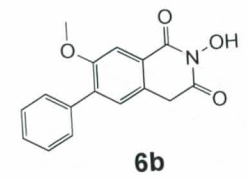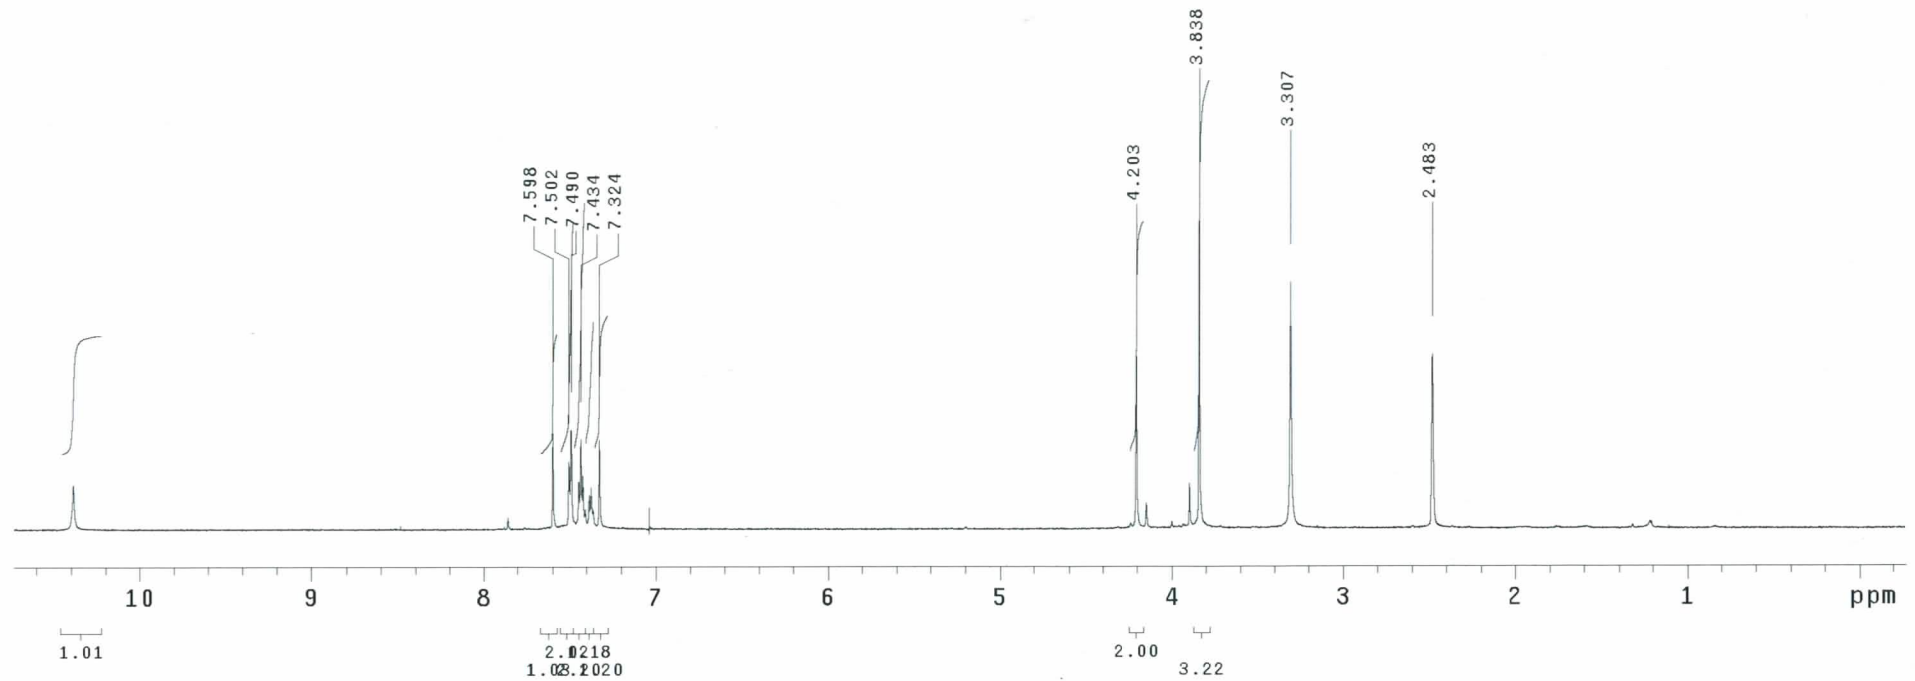

sv-7-263-carb

Sample Name:  
sv-7-263-carb  
Data Collected on:  
nmr6003-vnmrs600  
Archive directory:  
/data/sverneka  
Sample directory:  
20150326\_sv-7-263-carb\_01  
FidFile: sv-7-263-carb\_CARBON\_01

Pulse Sequence: CARBON (s2pu1)  
Solvent: dmsd  
Data collected on: Mar 26 2015

Temp. 25.0 C / 298.1 K  
Operator: sverneka

Relax. delay 1.000 sec  
Pulse 45.0 degrees  
Acq. time 0.865 sec  
Width 37878.8 Hz  
24000 repetitions  
OBSERVE C13, 150.7835006 MHz  
DECOUPLE H1, 599.6585190 MHz  
Power 43 dB  
continuously on  
WALTZ-16 modulated  
DATA PROCESSING  
Line broadening 0.5 Hz  
FT size 65536  
Total time 12 hr, 26 min

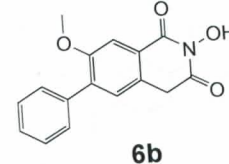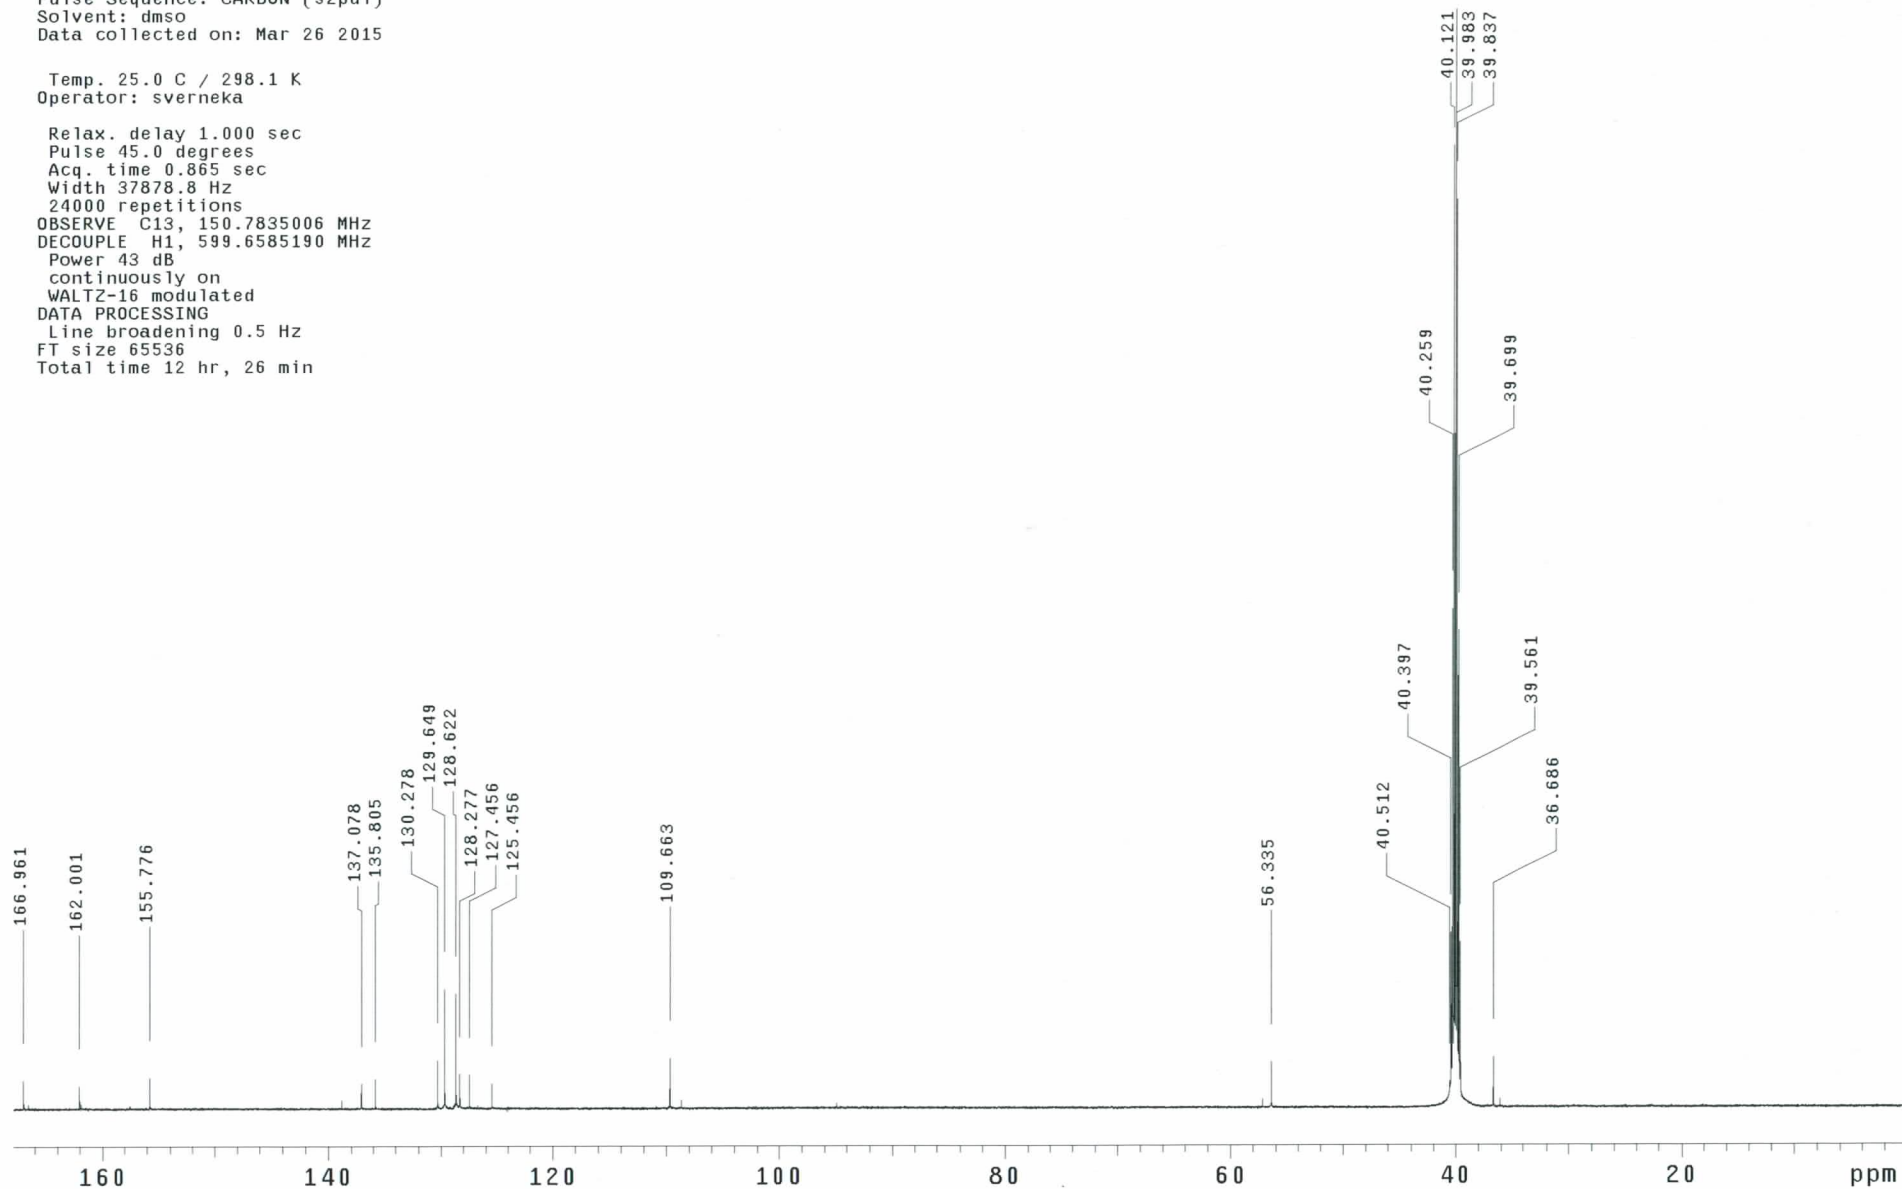



sv-7-261-carb

Sample Name:  
sv-7-261-carb  
Data Collected on:  
nmr6003-vnmrs600  
Archive directory:  
/data/sverneka  
Sample directory:  
20150325\_sv-7-261-carb\_01  
FidFile: sv-7-261-carb\_PROTON\_01

Pulse Sequence: PROTON (s2pu1)  
Solvent: dmsd  
Data collected on: Mar 25 2015

Temp. 25.0 C / 298.1 K  
Operator: sverneka

Relax. delay 1.000 sec  
Pulse 45.0 degrees  
Acq. time 1.704 sec  
Width 9615.4 Hz  
64 repetitions  
OBSERVE H1, 599.6554612 MHz  
DATA PROCESSING  
FT size 32768  
Total time 2 min 53 sec

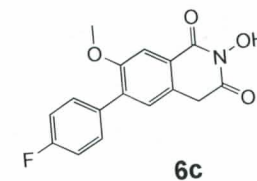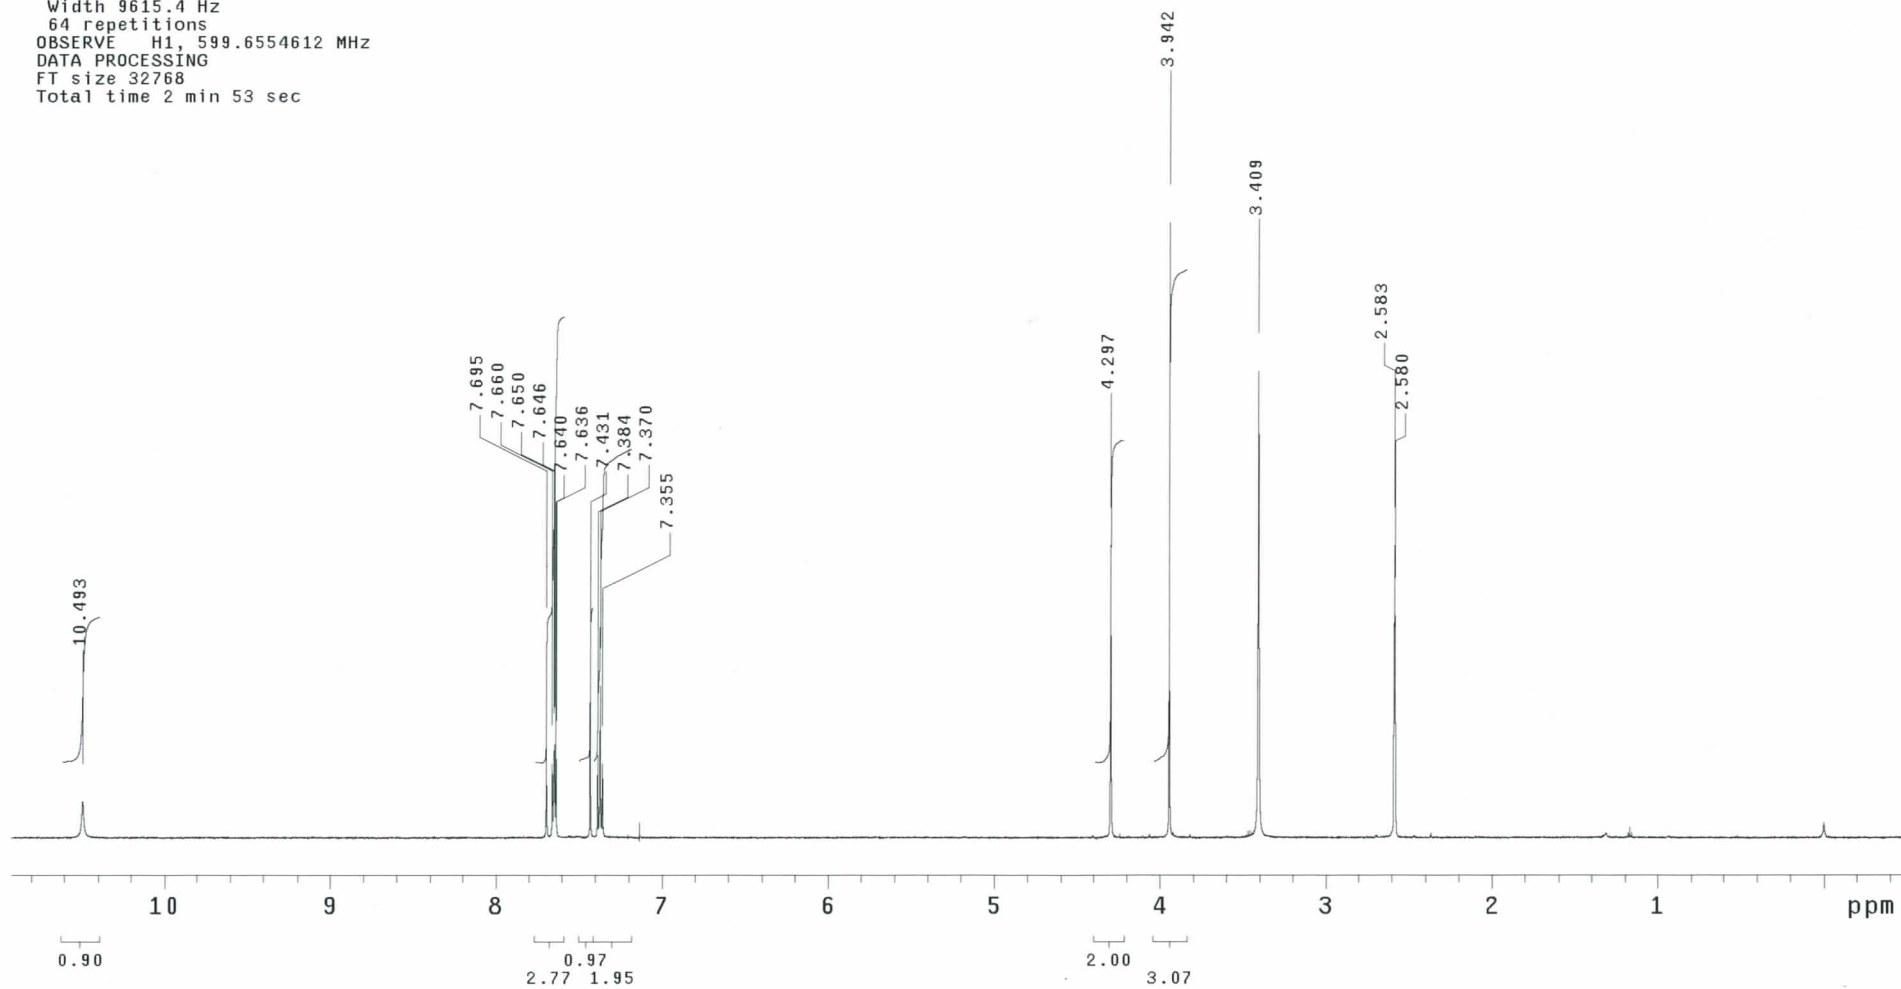

sv-7-261-carb

Sample Name: sv-7-261-carb  
Data Collected on: nmr6003-vnmrs600  
Archive directory: /data/sverneka  
Sample directory: 20150325\_sv-7-261-carb\_01  
FidFile: sv-7-261-carb\_CARBON\_01

Pulse Sequence: CARBON (s2pu1)  
Solvent: dmsd  
Data collected on: Mar 25 2015

Temp. 25.0 C / 298.1 K  
Operator: sverneka

Relax. delay 1.000 sec  
Pulse 45.0 degrees  
Acq. time 0.865 sec  
Width 37878.8 Hz  
25000 repetitions  
OBSERVE C13, 150.7835006 MHZ  
DECOUPLE H1, 599.6585190 MHZ  
Power 43 dB  
continuously on  
WALTZ-16 modulated  
DATA PROCESSING  
Line broadening 0.5 Hz  
FT size 65536  
Total time 12 hr, 57 min

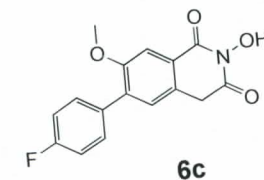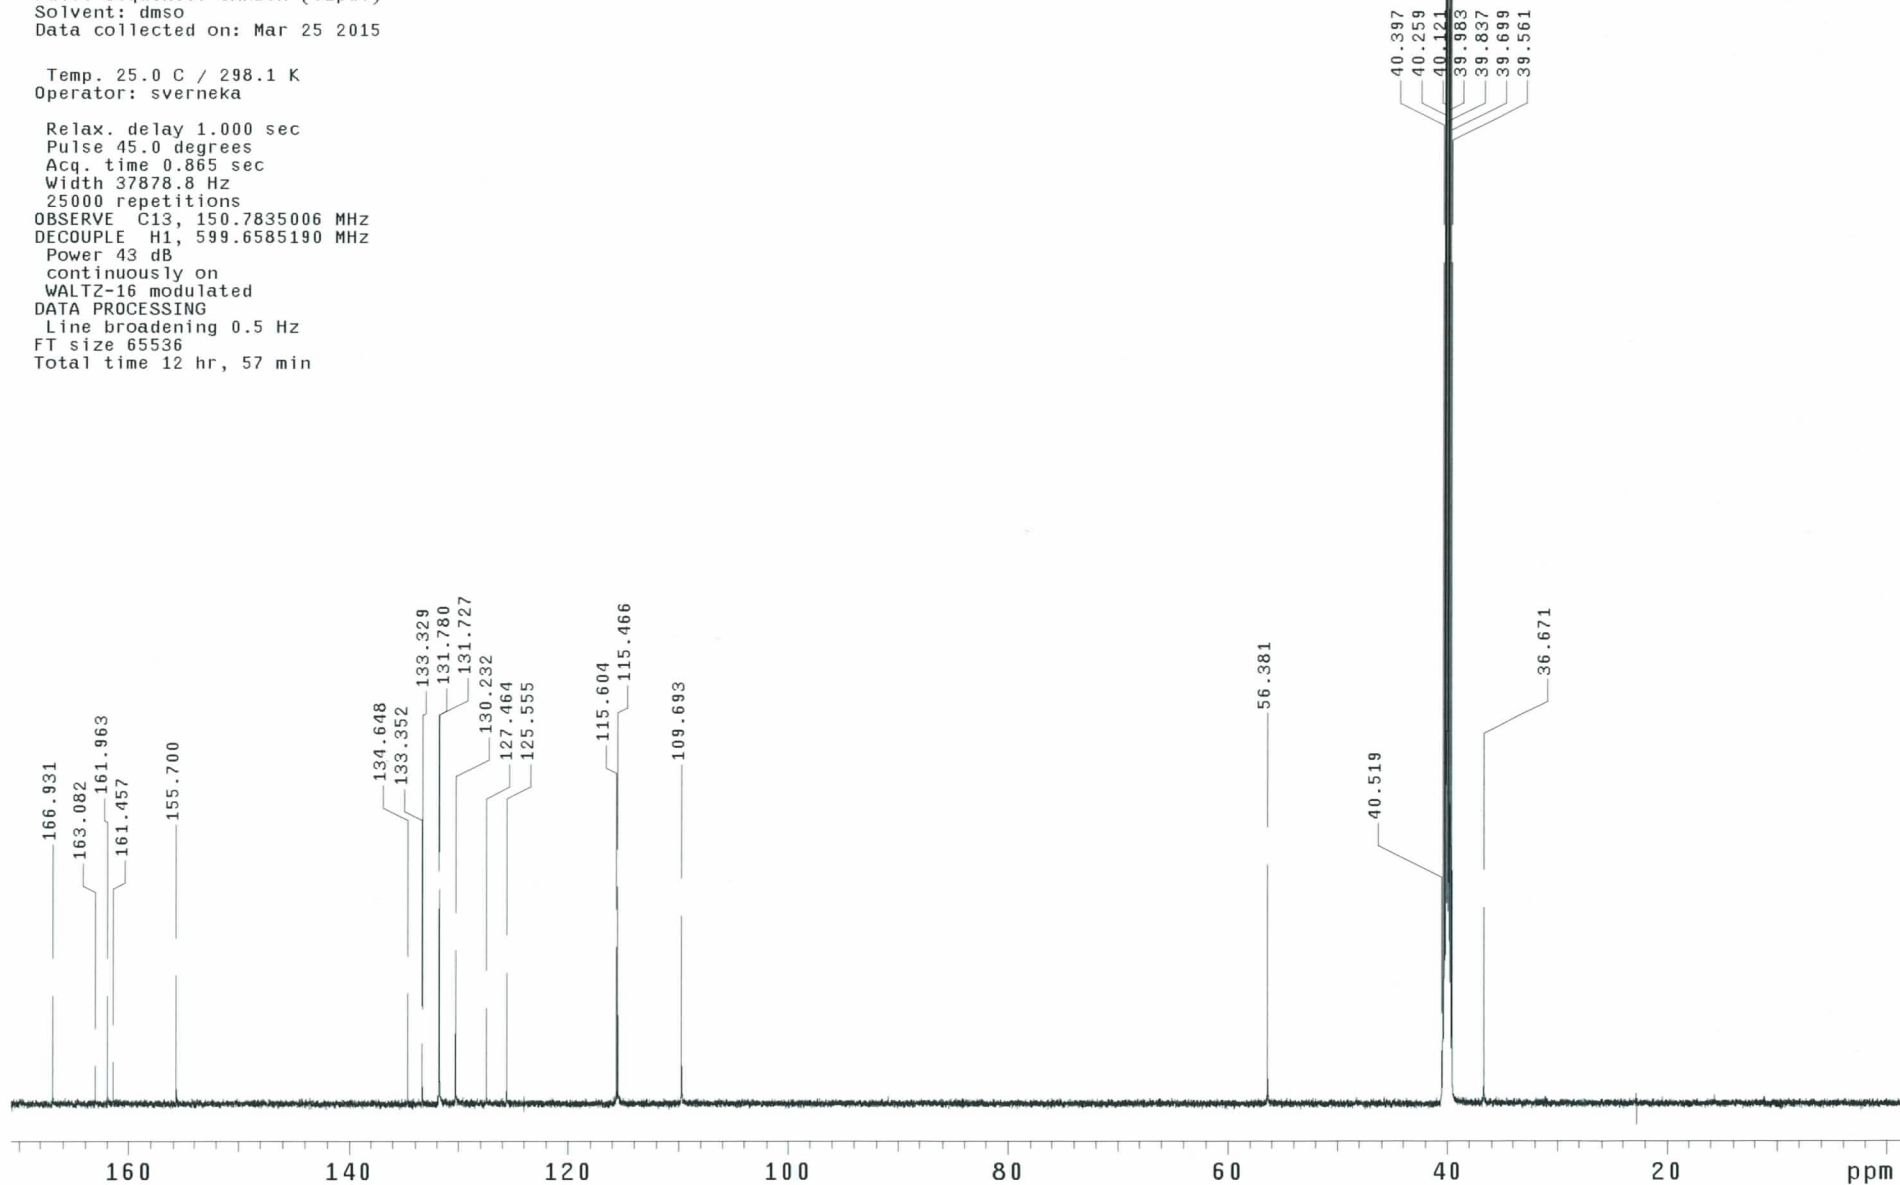

sv-7-251-carb

Sample Name:  
sv-7-251-carb  
Data Collected on:  
nmr6003-vnmrs600  
Archive directory:  
/data/sverneka  
Sample directory:  
20150306\_sv-7-251-carb\_01  
FidFile: sv-7-251-carb\_PROTON\_02

Pulse Sequence: PROTON (s2pu1)  
Solvent: dmsd  
Data collected on: Mar 7 2015

Temp. 25.0 C / 298.1 K  
Operator: sverneka

Relax. delay 1.000 sec  
Pulse 45.0 degrees  
Acq. time 1.704 sec  
Width 9615.4 Hz  
128 repetitions  
OBSERVE H1, 599.655207 MHz  
DATA PROCESSING  
FT size 32768  
Total time 5 min 46 sec

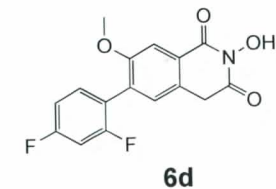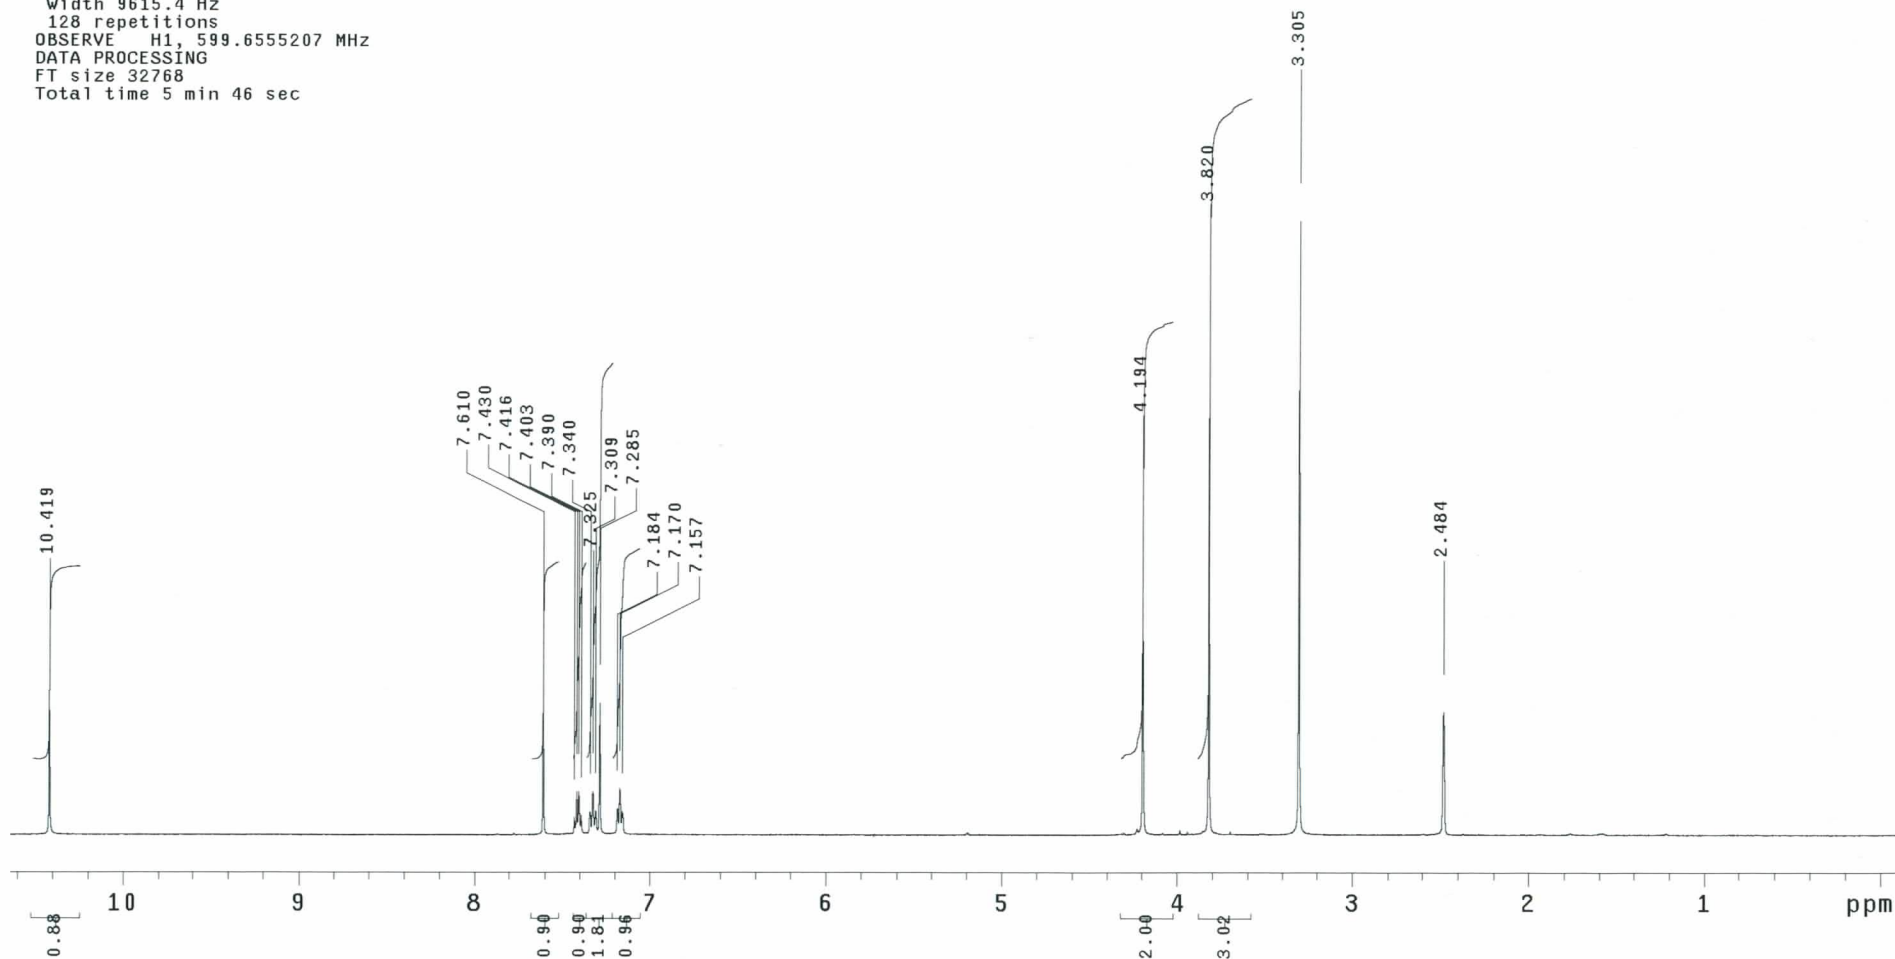

sv-7-251-carb

Sample Name:  
sv-7-251-carb  
Data Collected on:  
nmr6003-vnmrs600  
Archive directory:  
/data/sverneka  
Sample directory:  
20150306\_sv-7-251-carb\_01  
FidFile: sv-7-251-carb\_CARBON\_01

Pulse Sequence: CARBON (s2pu1)  
Solvent: dmsd  
Data collected on: Mar 6 2015

Temp. 25.0 C / 298.1 K  
Operator: sverneka

Relax. delay 1.000 sec  
Pulse 45.0 degrees  
Acq. time 0.865 sec  
Width 37878.8 Hz  
24000 repetitions  
OBSERVE C13, 150.7835006 MHz  
DECOUPLE H1, 599.6585190 MHz  
Power 43 dB  
continuously on  
WALTZ-16 modulated  
DATA PROCESSING  
Line broadening 0.5 Hz  
FT size 65536  
Total time 12 hr, 26 min

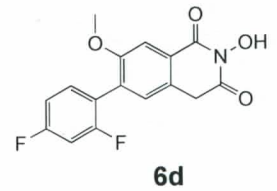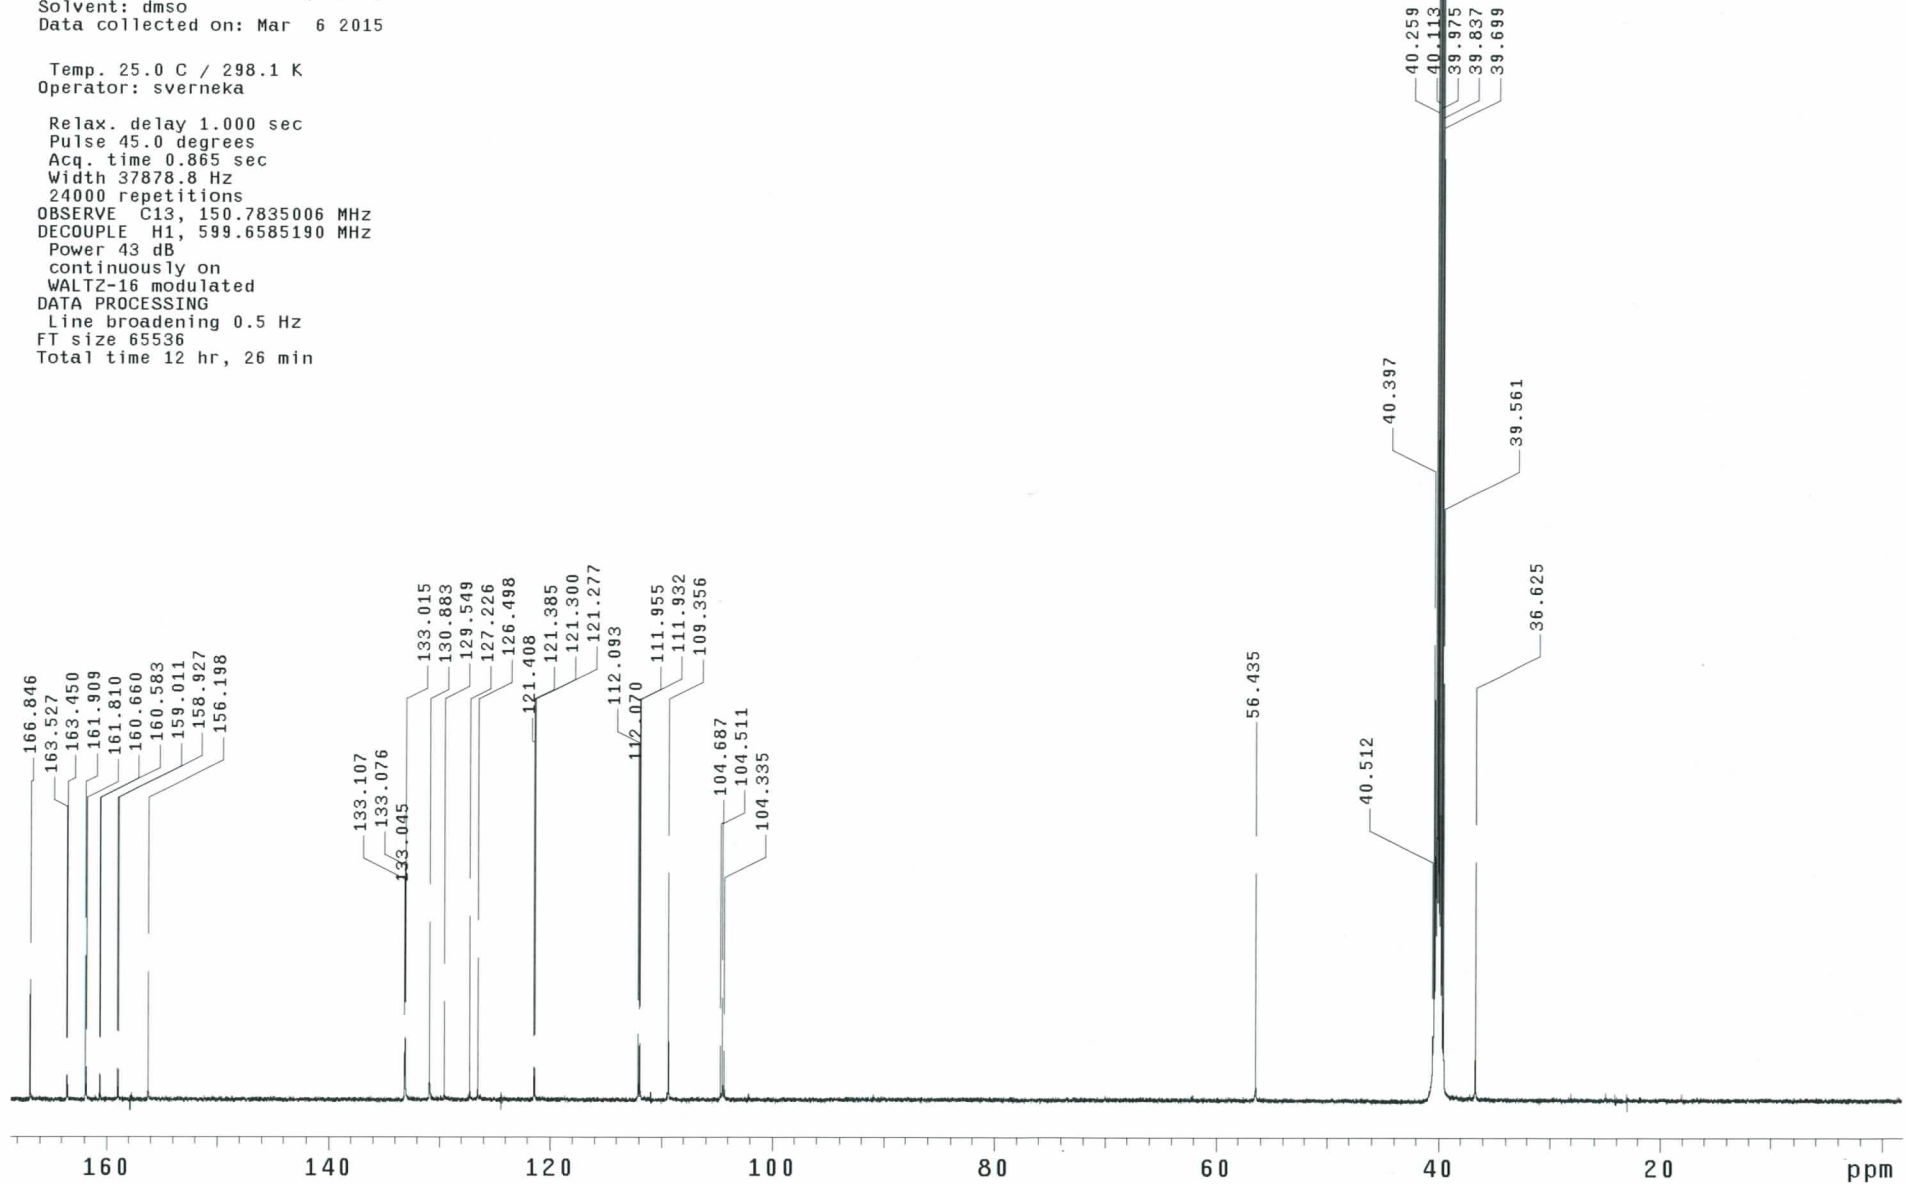

sv-7-111

Sample Name:  
sv-7-111  
Data Collected on:  
nmr6003-vnmrs600  
Archive directory:  
/data/sverneka  
Sample directory:  
20141014\_sv-7-111\_01  
FidFile: sv-7-111\_PROTON\_01

Pulse Sequence: PROTON (s2pu1)  
Solvent: dmsd  
Data collected on: Oct 14 2014

Temp. 25.0 C / 298.1 K  
Operator: sverneka

Relax. delay 1.000 sec  
Pulse 45.0 degrees  
Acq. time 1.704 sec  
Width 9615.4 Hz  
8 repetitions  
OBSERVE H1, 599.655207 MHz  
DATA PROCESSING  
FT size 32768  
Total time 0 min 22 sec

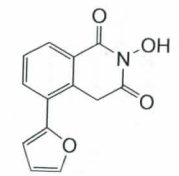

7a

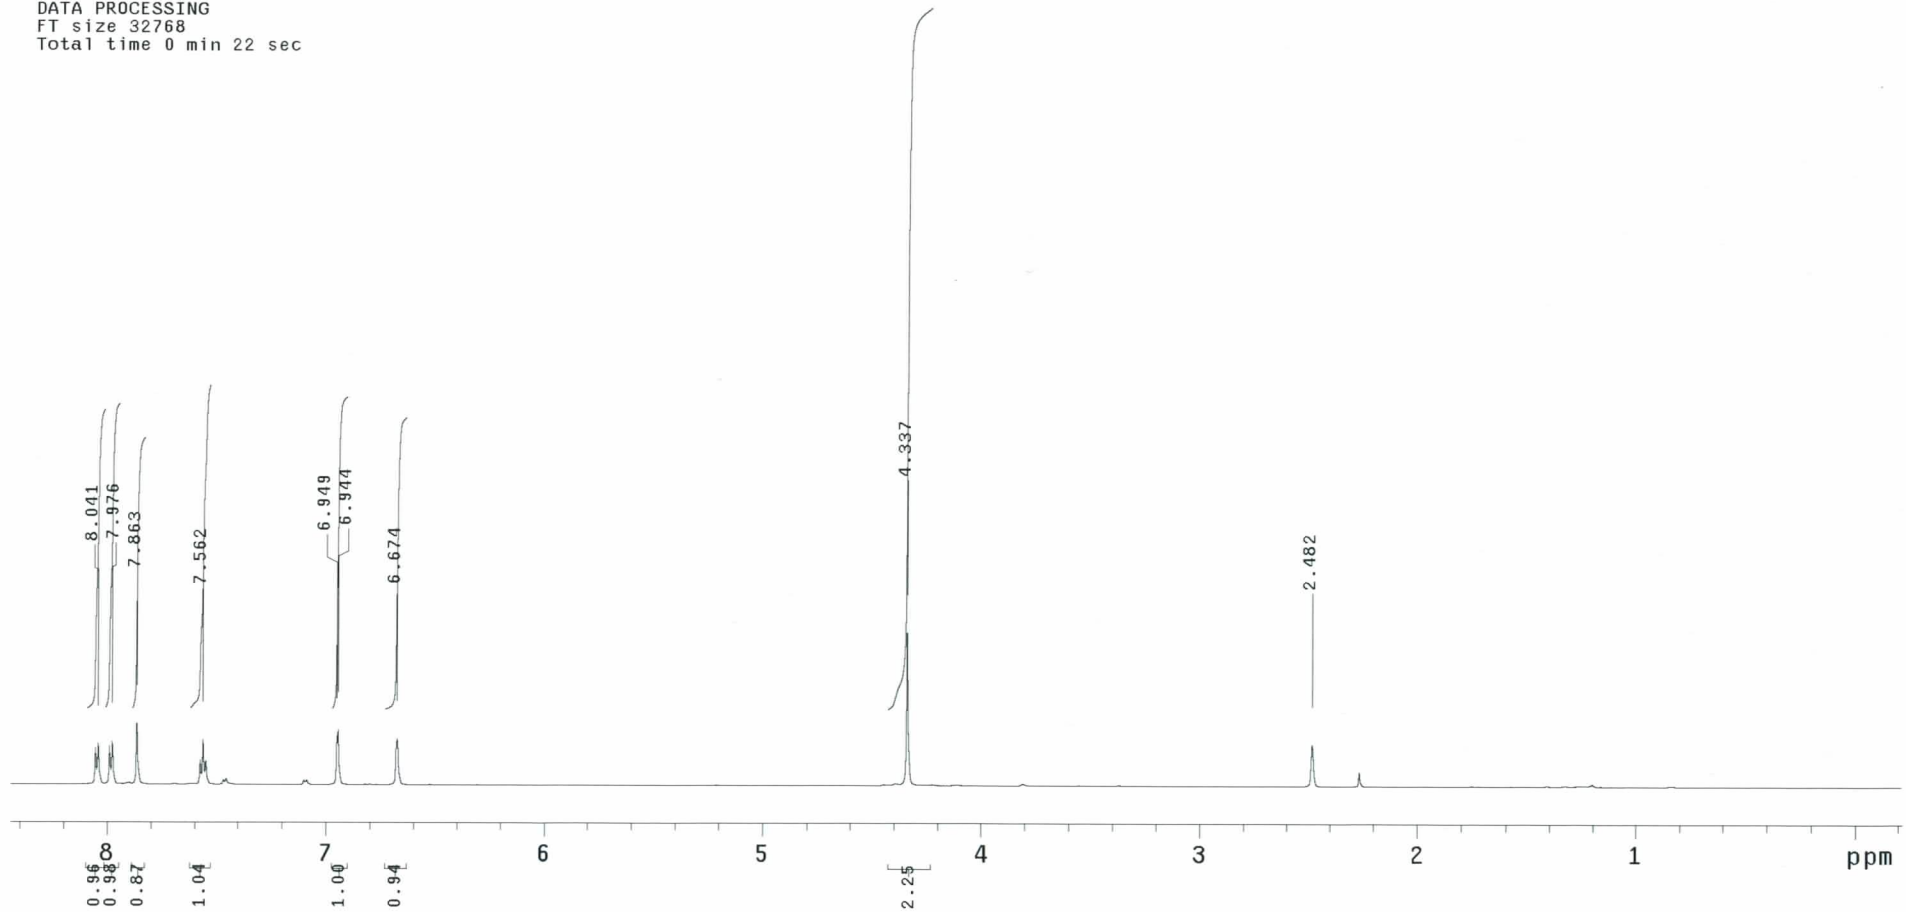

sv-7-111

Sample Name:  
sv-7-111  
Data Collected on:  
nmr6003-vnmrs600  
Archive directory:  
/data/sverneka  
Sample directory:  
20141014\_sv-7-111\_01  
FidFile: sv-7-111\_CARBON\_01

Pulse Sequence: CARBON (s2pul)  
Solvent: dmsd  
Data collected on: Oct 14 2014

Temp. 25.0 C / 298.1 K  
Operator: sverneka

Relax. delay 1.000 sec  
Pulse 45.0 degrees  
Acq. time 0.865 sec  
Width 37878.8 Hz  
2000 repetitions  
OBSERVE C13, 150.7835006 MHz  
DECOUPLE H1, 599.6585190 MHz  
Power 36 dB  
continuously on  
WALTZ-16 modulated  
DATA PROCESSING  
Line broadening 0.5 Hz  
FT size 65536  
Total time 1 hr, 2 min

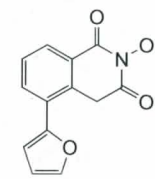

7a

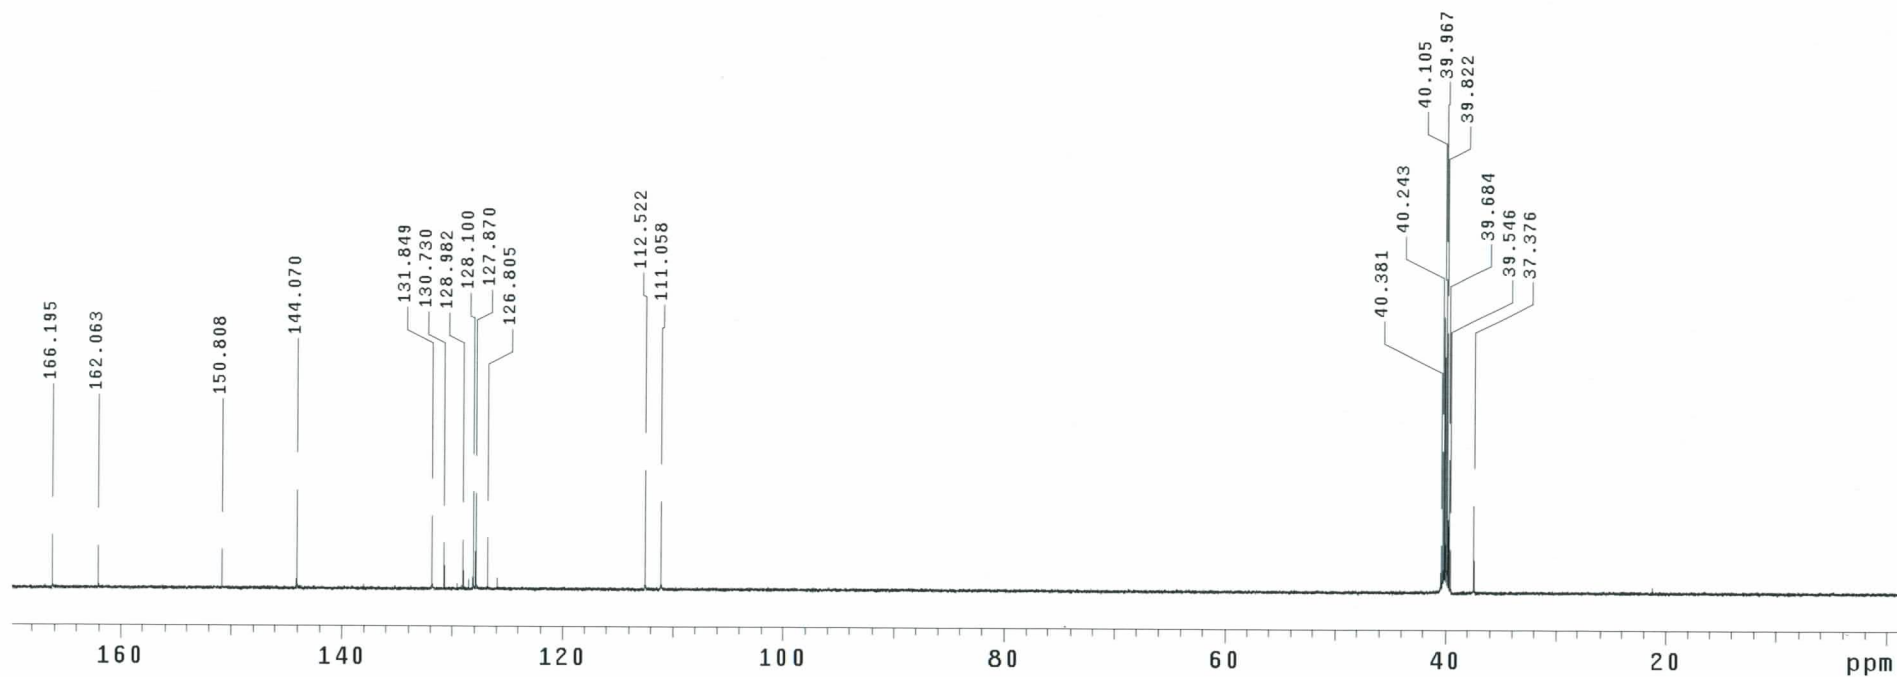

sv-7-83-carb

Sample Name:  
sv-7-83-carb  
Data Collected on:  
nmr6003-vnmrs600  
Archive directory:  
/data/sverneka  
Sample directory:  
20141023\_sv-7-83-carb\_01  
FidFile: sv-7-83-carb\_PROTON\_01

Pulse Sequence: PROTON (s2pu1)  
Solvent: dms0  
Data collected on: Oct 23 2014

Temp. 25.0 C / 298.1 K  
Operator: sverneka

Relax. delay 1.000 sec  
Pulse 45.0 degrees  
Acq. time 1.704 sec  
Width 9615.4 Hz  
64 repetitions  
OBSERVE H1, 599.655207 MHz  
DATA PROCESSING  
FT size 32768  
Total time 2 min 53 sec

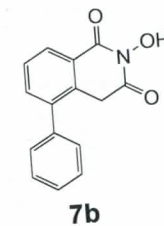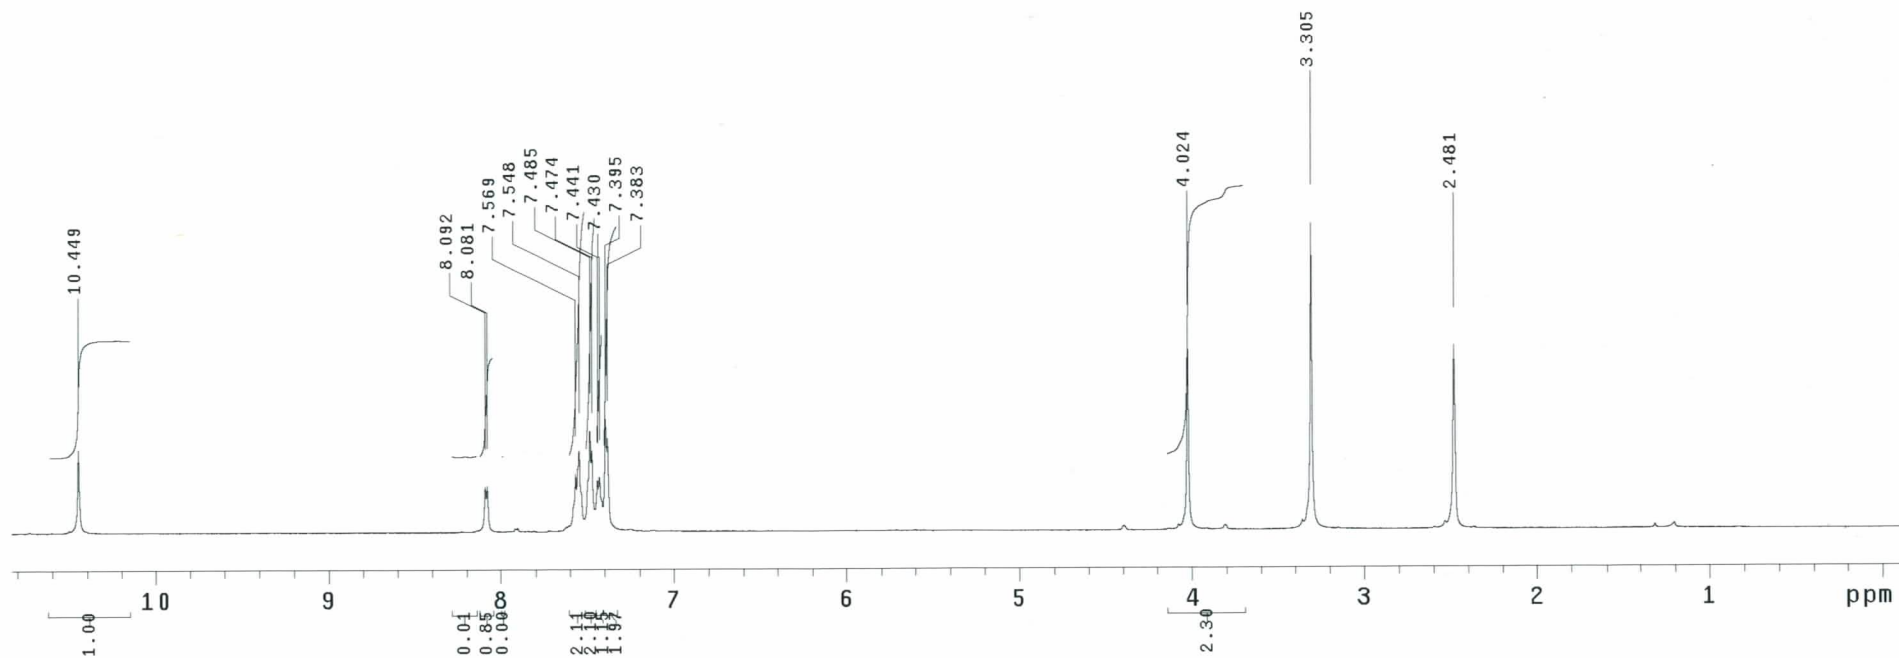

sv-7-83-carb

Sample Name:  
sv-7-83-carb  
Data Collected on:  
nmr6003-vnmrs600  
Archive directory:  
/data/sverneka  
Sample directory:  
20141023\_sv-7-83-carb\_01  
FidFile: sv-7-83-carb\_CARBN\_01

Pulse Sequence: CARBN (s2pu1)  
Solvent: dmsd  
Data collected on: Oct 23 2014

Temp. 25.0 C / 298.1 K  
Operator: sverneka

Relax. delay 1.000 sec  
Pulse 45.0 degrees  
Acq. time 0.865 sec  
Width 37878.8 Hz  
28500 repetitions  
OBSERVE C13, 150.7835006 MHz  
DECOUPLE H1, 599.6585190 MHz  
Power 36 dB  
continuously on  
WALTZ-16 modulated  
DATA PROCESSING  
Line broadening 0.5 Hz  
FT size 65536  
Total time 14 hr, 45 min

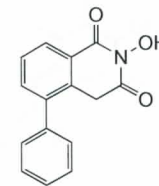

7b

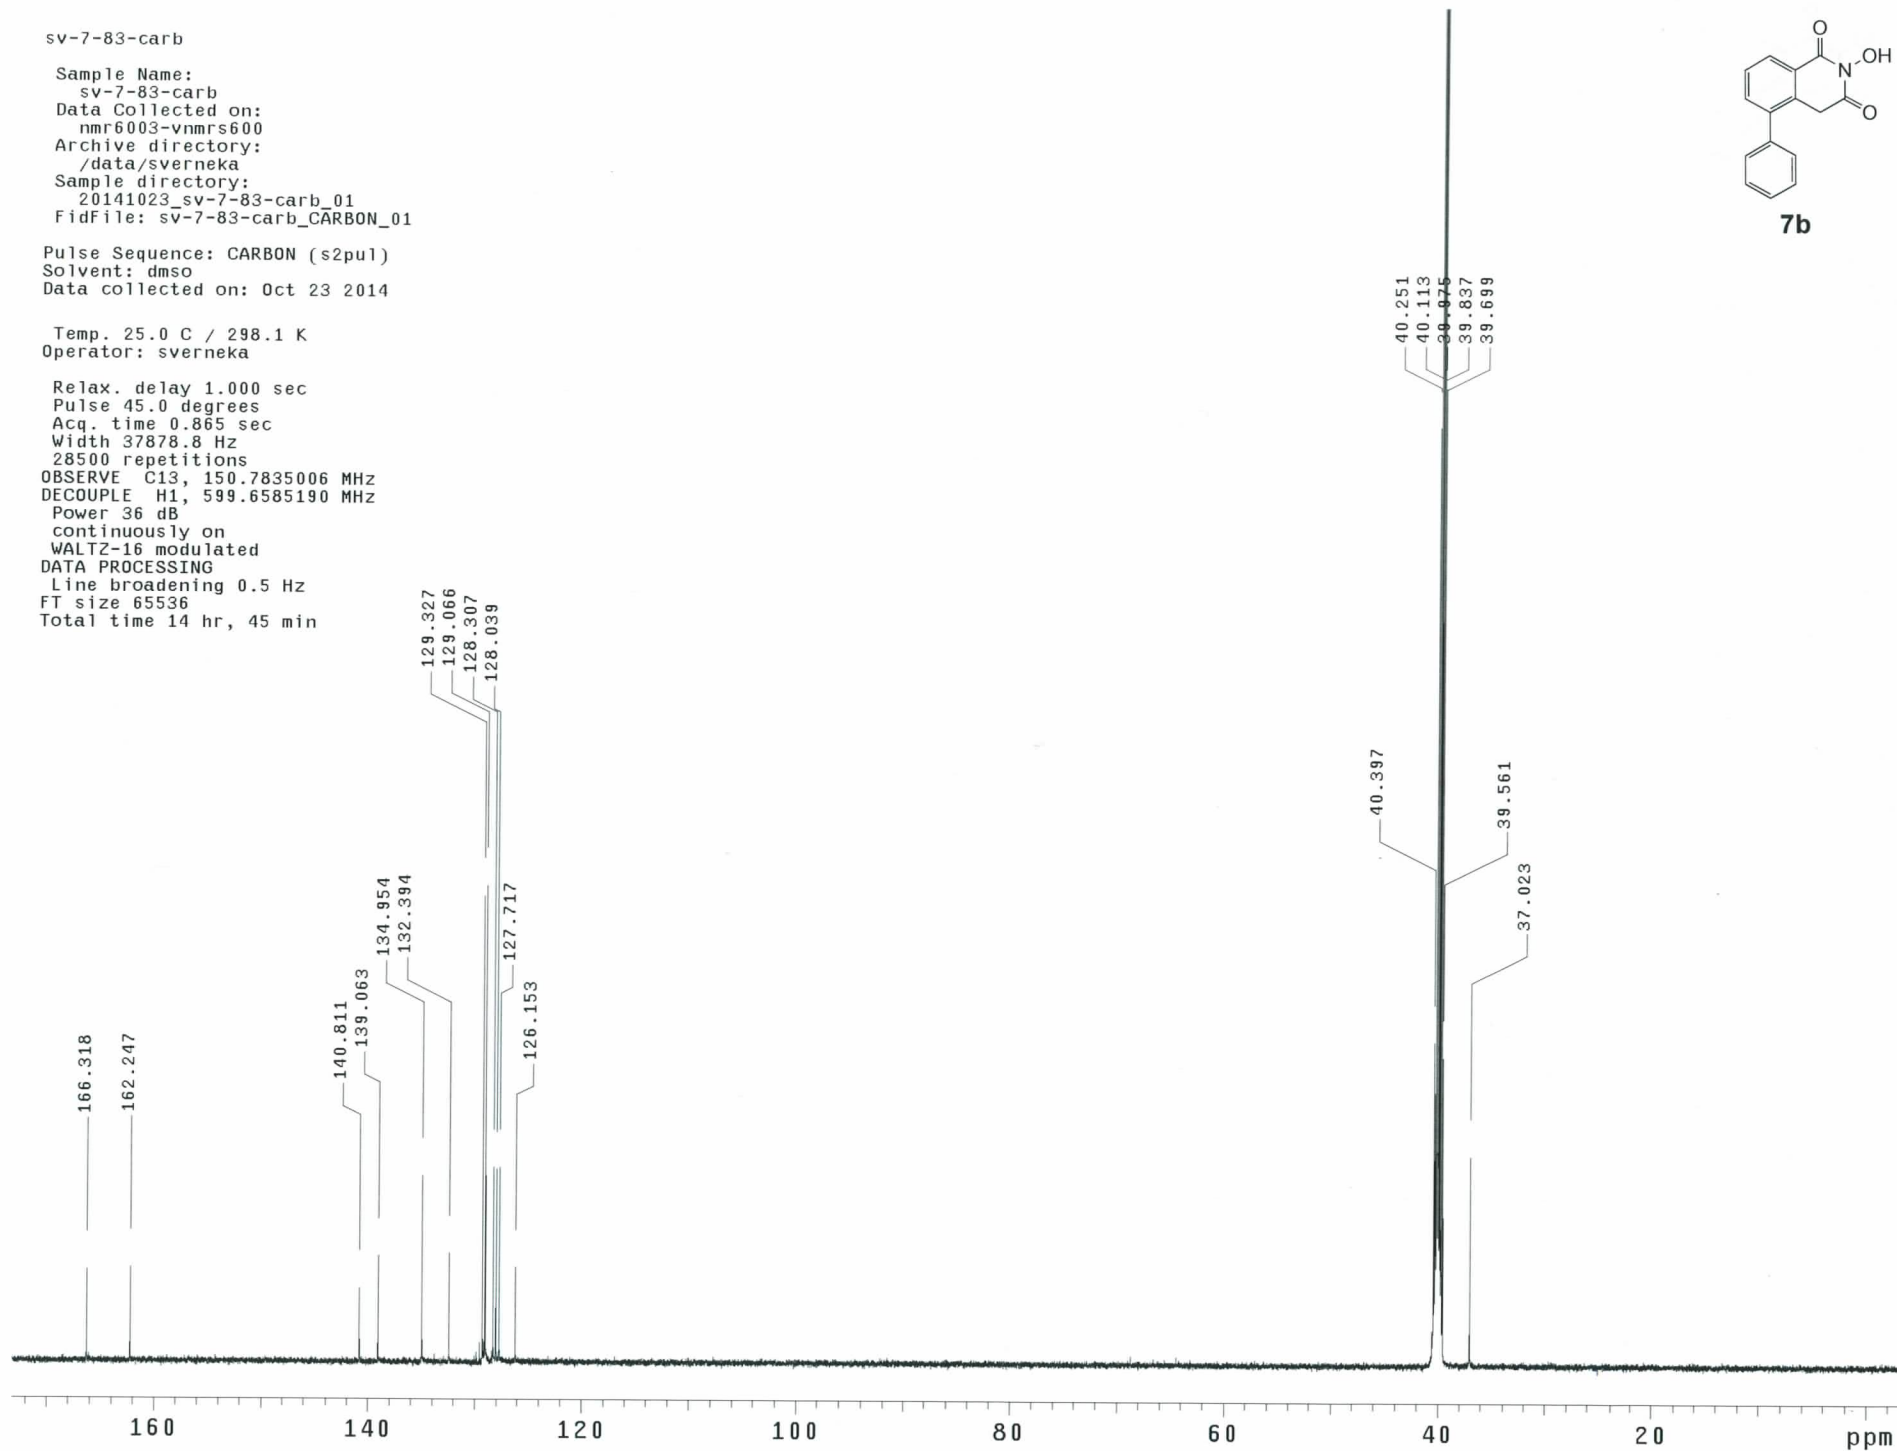



sv-7-77-carbon

Sample Name:  
sv-7-77-carbon  
Data Collected on:  
nmr6003-vnmrs600  
Archive directory:  
/data/sverneka  
Sample directory:  
20141105\_sv-7-77-carbon\_01  
FidFile: sv-7-77-carbon\_PROTON\_01

Pulse Sequence: PROTON (s2pu1)  
Solvent: dms0  
Data collected on: Nov 5 2014

Temp. 25.0 C / 298.1 K  
Operator: sverneka

Relax. delay 1.000 sec  
Pulse 45.0 degrees  
Acq. time 1.704 sec  
Width 9615.4 Hz  
64 repetitions  
OBSERVE H1, 599.6555103 MHz  
DATA PROCESSING  
FT size 32768  
Total time 2 min 53 sec

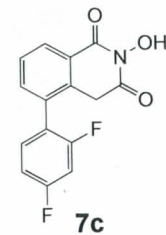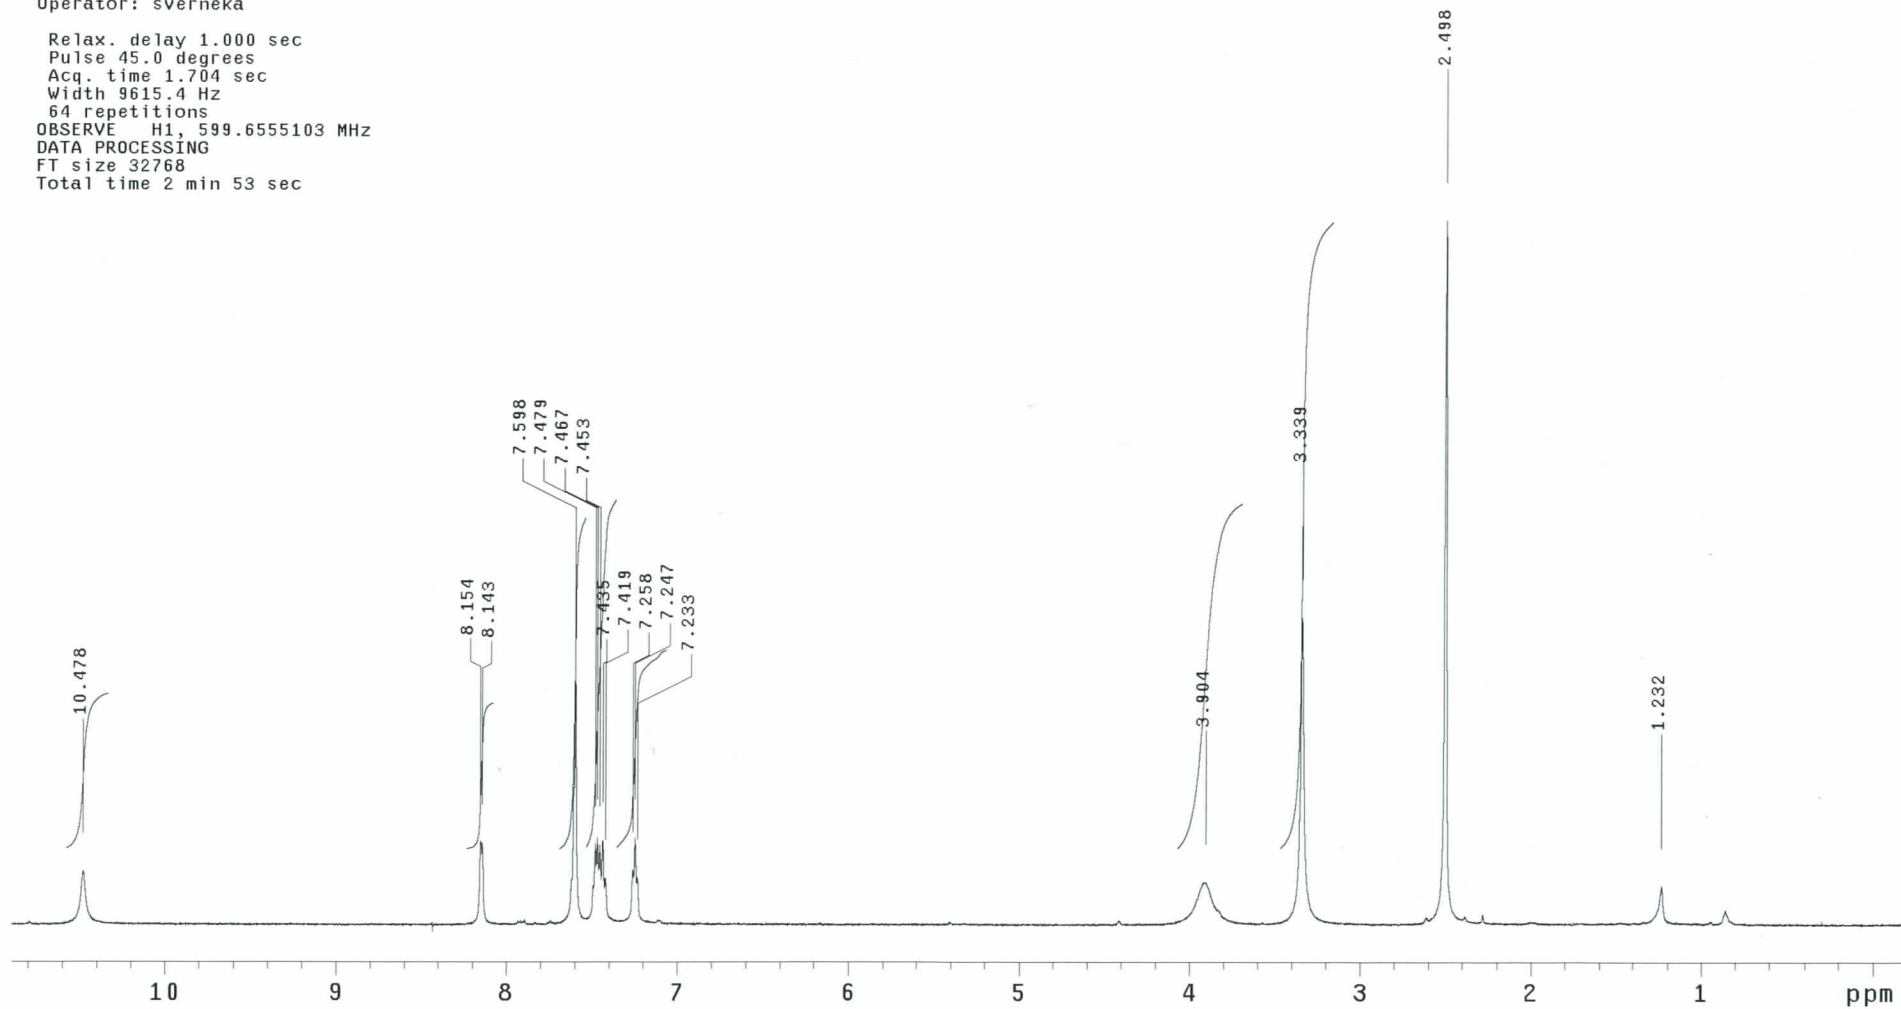

sv-7-77-carbon

Sample Name:  
sv-7-77-carbon  
Data Collected on:  
nmr6003-vnmrs600  
Archive directory:  
/data/sverneka  
Sample directory:  
20141105\_sv-7-77-carbon\_01  
FidFile: sv-7-77-carbon\_CARBON\_01

Pulse Sequence: CARBON (s2pu1)  
Solvent: dms0  
Data collected on: Nov 5 2014

Temp. 25.0 C / 298.1 K  
Operator: sverneka

Relax. delay 1.000 sec  
Pulse 45.0 degrees  
Acq. time 0.865 sec  
Width 37878.8 Hz  
29000 repetitions  
OBSERVE C13, 150.7835006 MHz  
DECOUPLE H1, 599.6585190 MHz  
Power 36 dB  
continuously on  
WALTZ-16 modulated  
DATA PROCESSING  
Line broadening 0.5 Hz  
FT size 65536  
Total time 15 hr, 1 min

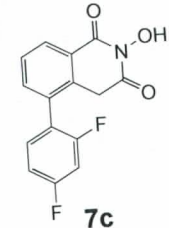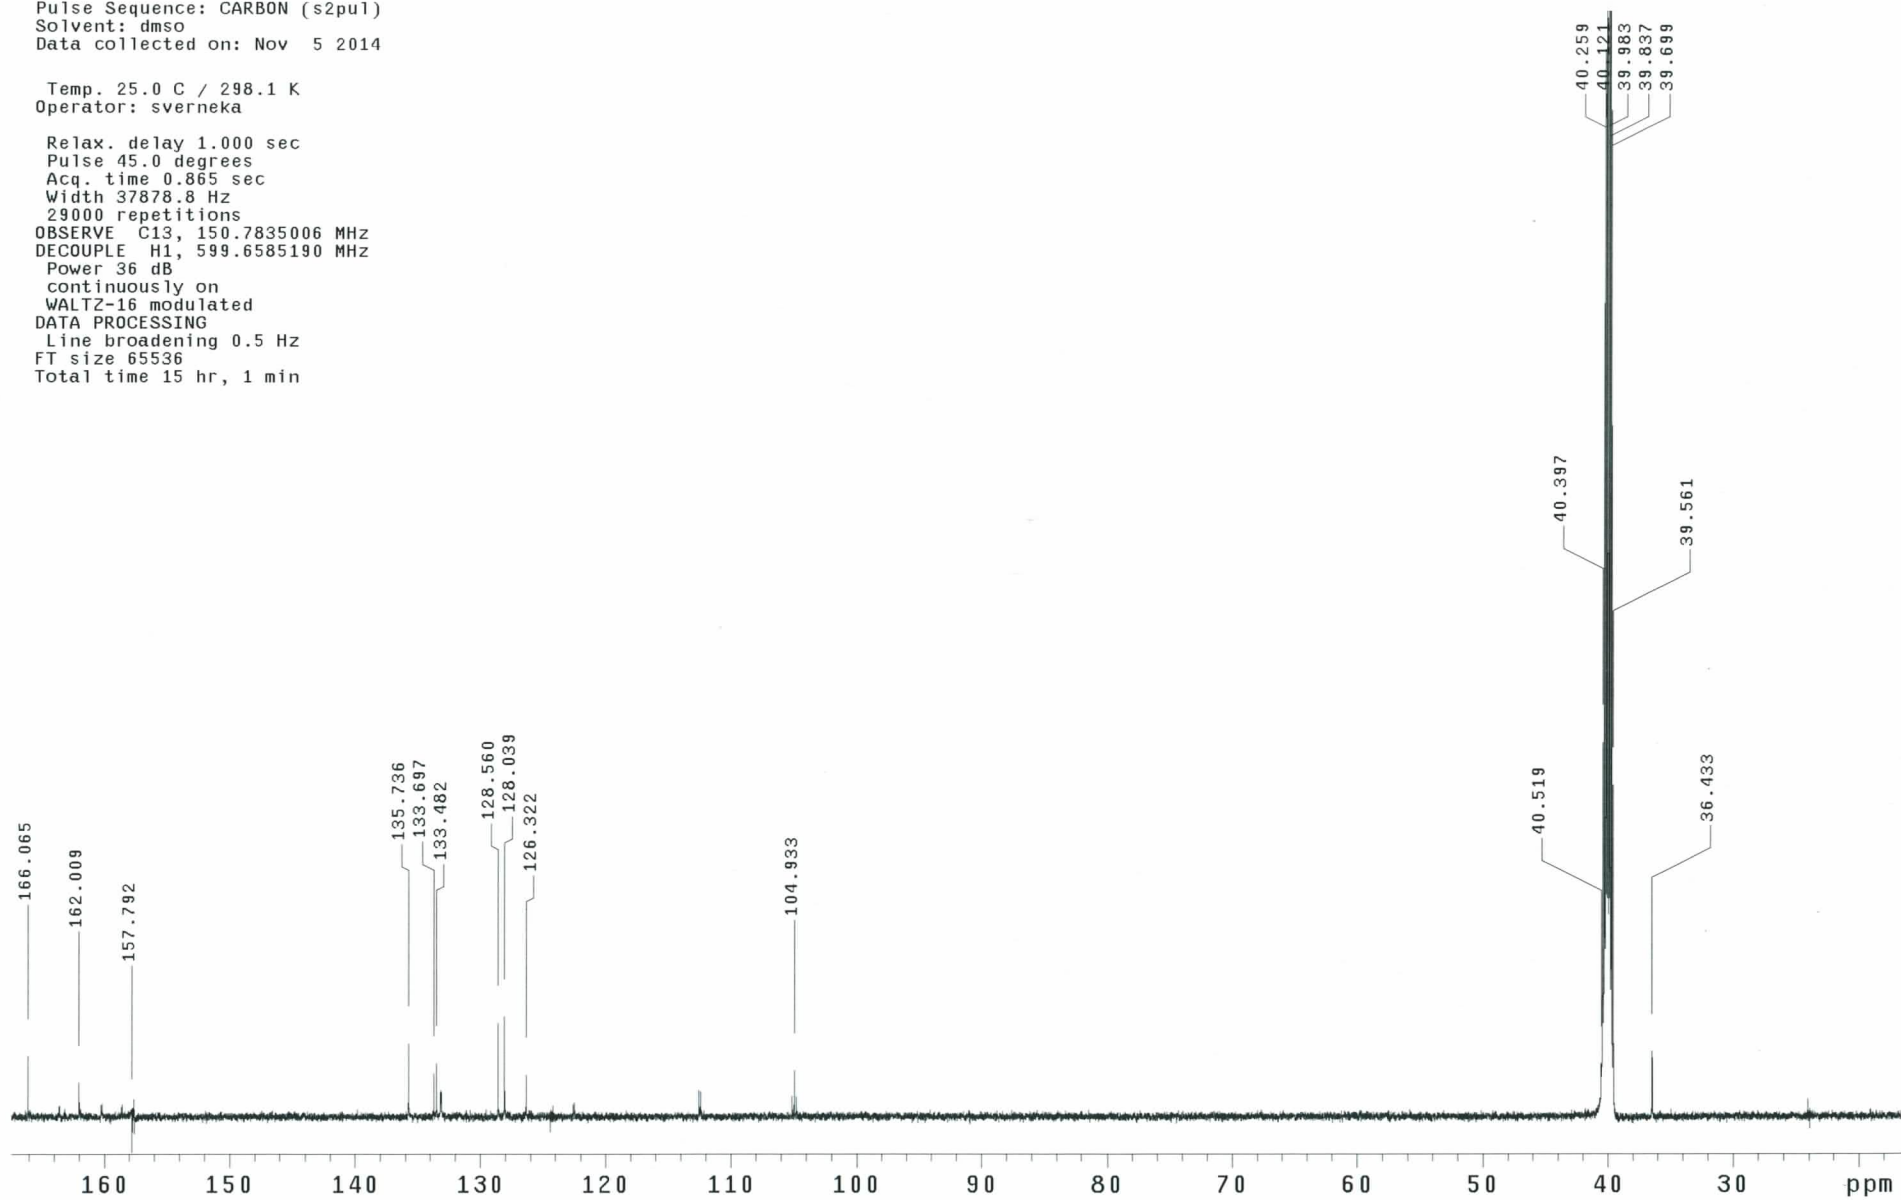

sv-7-63-carbon

Sample Name:  
sv-7-63-carbon  
Data Collected on:  
nmr6003-vnmrs600  
Archive directory:  
/data/sverneka  
Sample directory:  
20140924\_sv-7-63-carbon\_01  
FidFile: sv-7-63-carbon\_PROTON\_01

Pulse Sequence: PROTON (s2pu1)  
Solvent: dms0  
Data collected on: Sep 24 2014

Temp. 25.0 C / 298.1 K  
Operator: sverneka

Relax. delay 1.000 sec  
Pulse 45.0 degrees  
Acq. time 1.704 sec  
Width 9615.4 Hz  
32 repetitions  
OBSERVE H1, 599.655207 MHz  
DATA PROCESSING  
FT size 32768  
Total time 1 min 27 sec

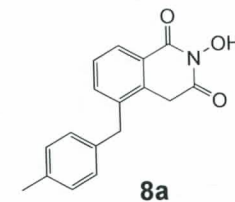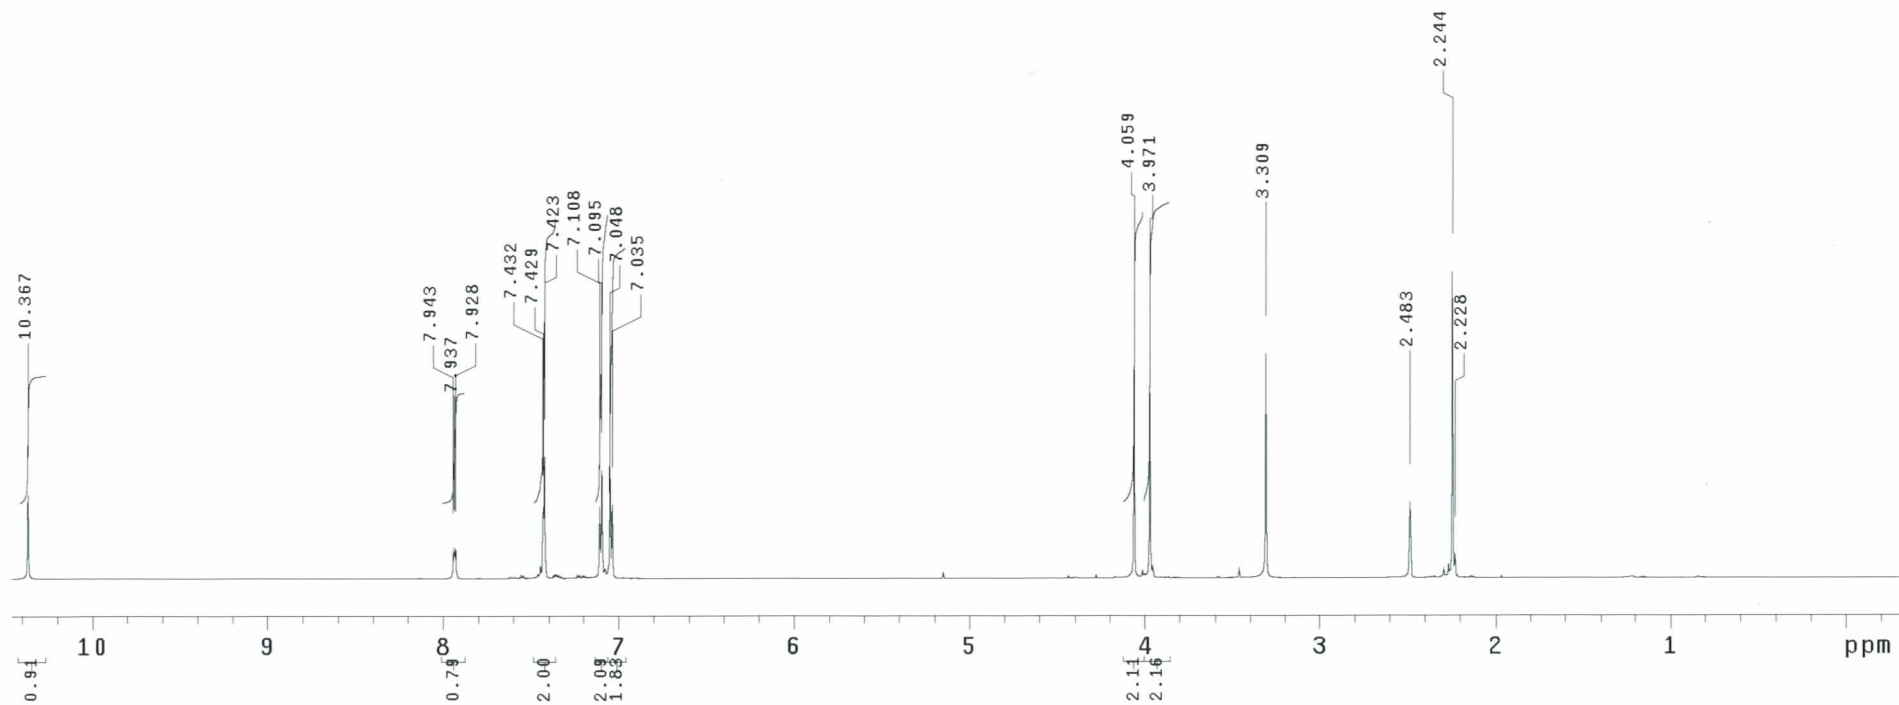

sv-7-63-carbon

Sample Name:  
sv-7-63-carbon  
Data Collected on:  
nmr6003-vnmrs600  
Archive directory:  
/data/sverneka  
Sample directory:  
20140924\_sv-7-63-carbon\_01  
FidFile: sv-7-63-carbon\_CARBON\_01

Pulse Sequence: CARBON (s2pu1)  
Solvent: dmsd  
Data collected on: Sep 24 2014

Temp. 25.0 C / 298.1 K  
Operator: sverneka

Relax. delay 1.000 sec  
Pulse 45.0 degrees  
Acq. time 0.865 sec  
Width 37878.8 Hz  
24000 repetitions  
OBSERVE C13, 150.7835006 MHz  
DECOUPLE H1, 599.6585190 MHz  
Power 36 dB  
continuously on  
WALTZ-16 modulated  
DATA PROCESSING  
Line broadening 0.5 Hz  
FT size 65536  
Total time 12 hr, 26 min

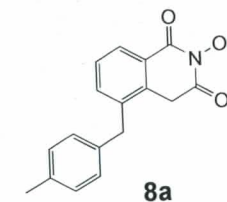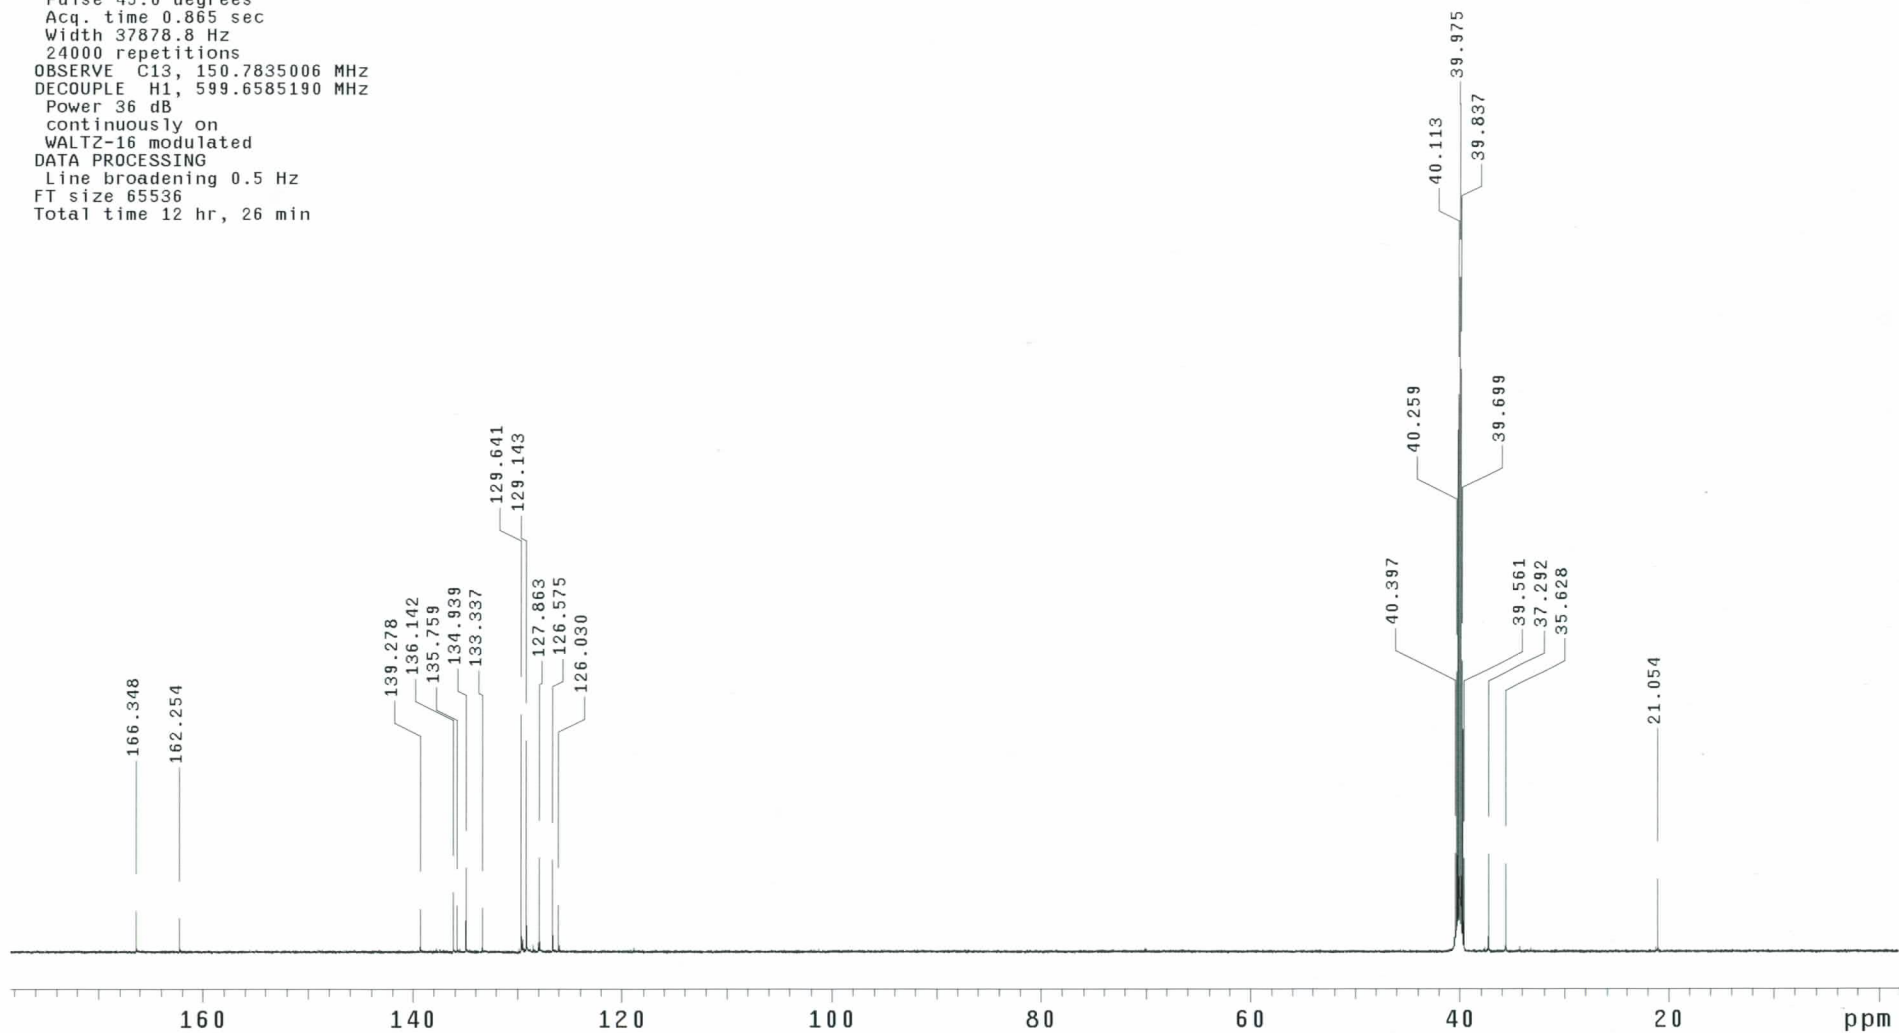

sv-7-35-new-1

Sample Name:  
sv-7-35-new-1  
Data Collected on:  
nmr6003-vnmrs600  
Archive directory:  
/data/sverneka  
Sample directory:  
20140925\_sv-7-35-new-1\_01  
FidFile: sv-7-35-new-1\_PROTON\_01

Pulse Sequence: PROTON (s2pu1)  
Solvent: cd3od  
Data collected on: Sep 25 2014

Temp. 25.0 C / 298.1 K  
Operator: sverneka

Relax. delay 1.000 sec  
Pulse 45.0 degrees  
Acq. time 1.704 sec  
Width 9615.4 Hz  
32 repetitions  
OBSERVE H1, 599.6550350 MHz  
DATA PROCESSING  
FT size 32768  
Total time 1 min 27 sec

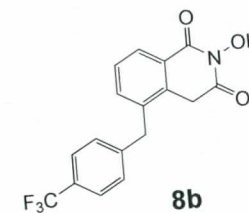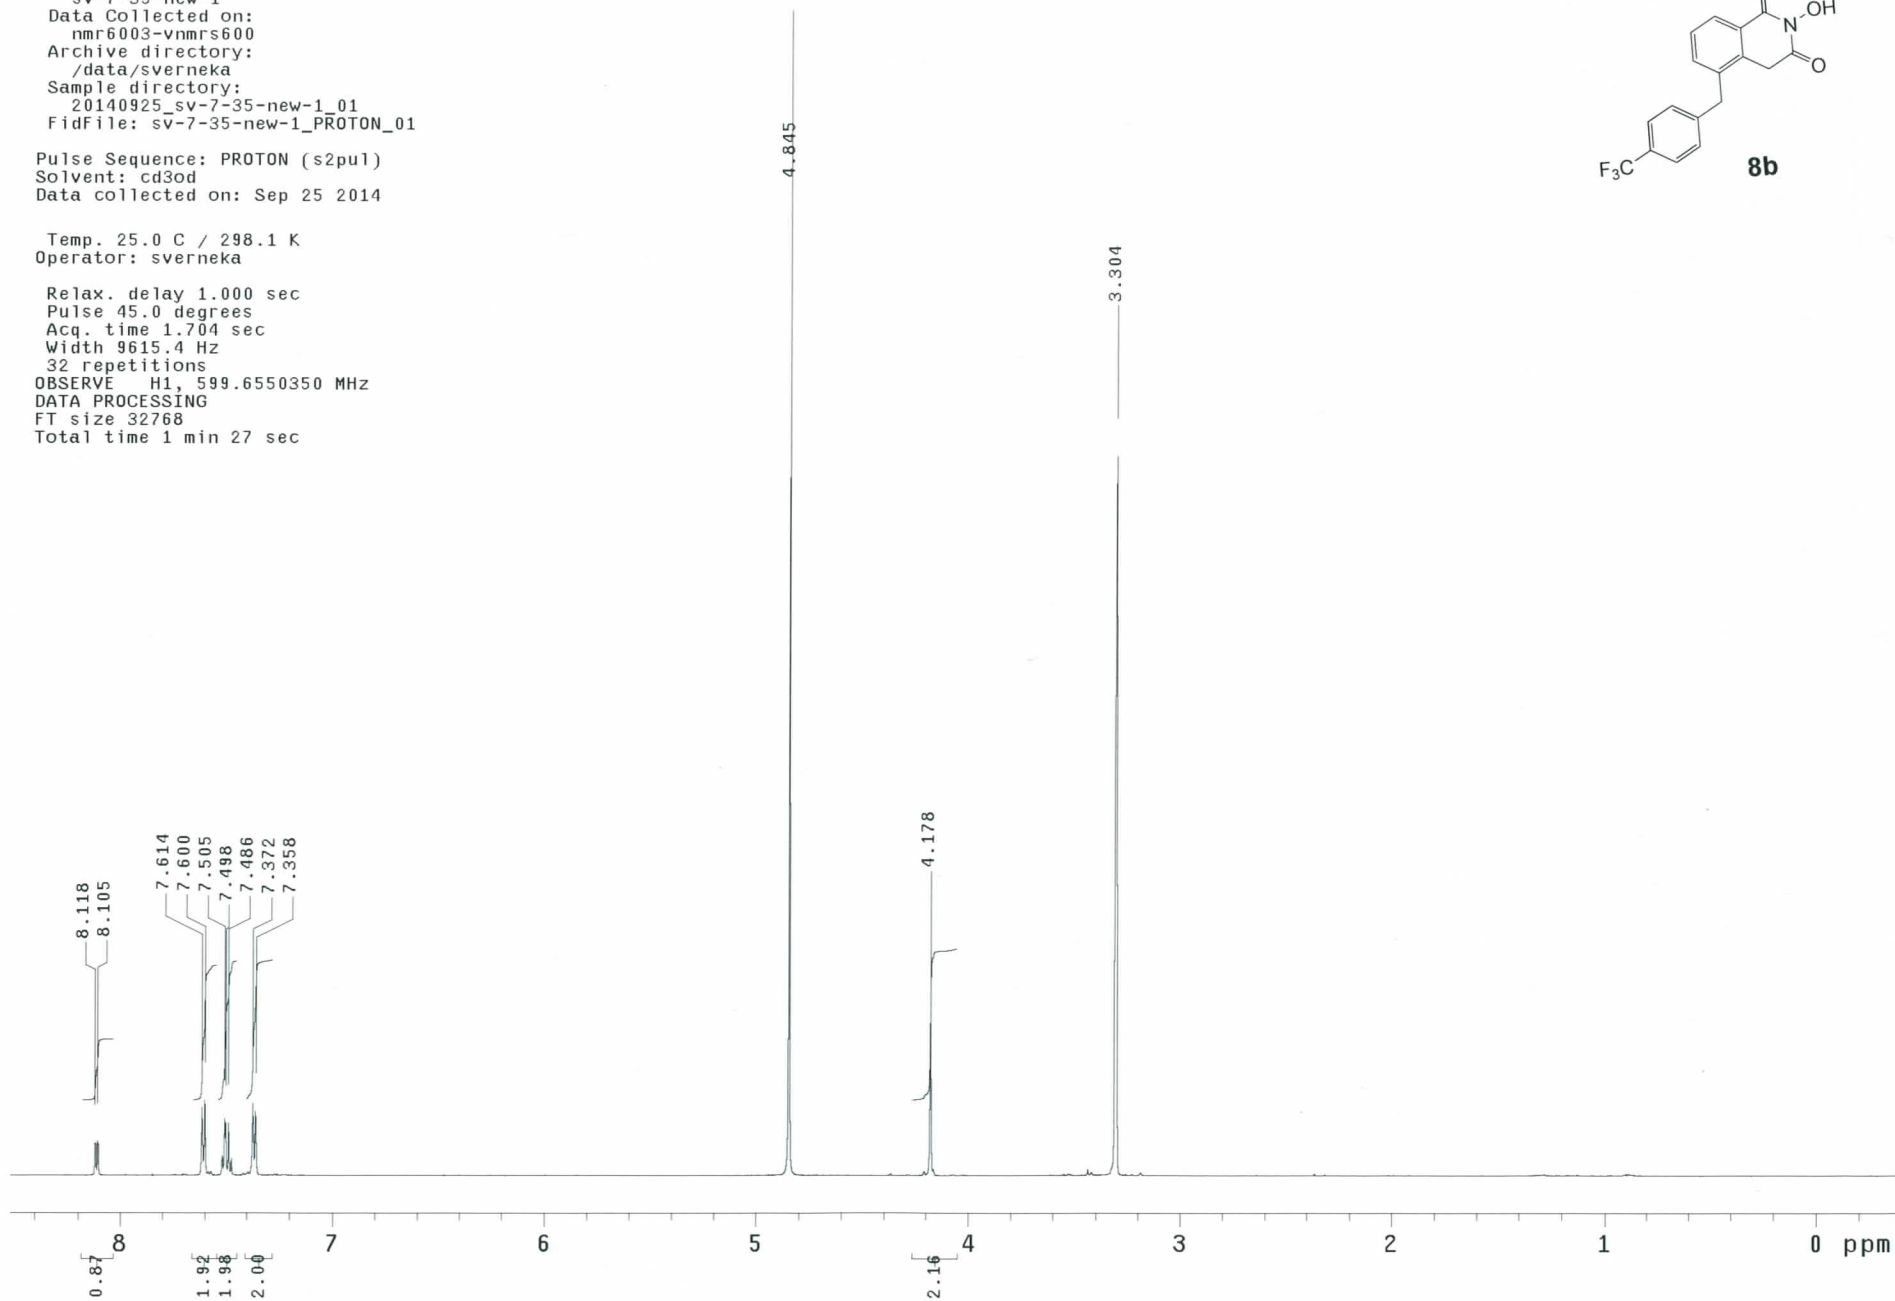

sv-7-35-carbon-1

Sample Name:  
sv-7-35-carbon-1  
Data Collected on:  
nmr6003-vnmrs600  
Archive directory:  
/data/sverneka  
Sample directory:  
20141007\_sv-7-35-carbon-1\_01  
FidFile: sv-7-35-carbon-1\_CARBON\_01

Pulse Sequence: CARBON (s2pu1)  
Solvent: cd3od  
Data collected on: Oct 7 2014

Temp. 25.0 C / 298.1 K  
Operator: sverneka

Relax. delay 1.000 sec  
Pulse 45.0 degrees  
Acq. time 0.865 sec  
Width 37878.8 Hz  
25000 repetitions  
OBSERVE C13, 150.7833785 MHz  
DECOUPLE H1, 599.6580333 MHz  
Power 36 dB  
continuously on  
WALTZ-16 modulated  
DATA PROCESSING  
Line broadening 0.5 Hz  
FT size 65536  
Total time 12 hr, 57 min

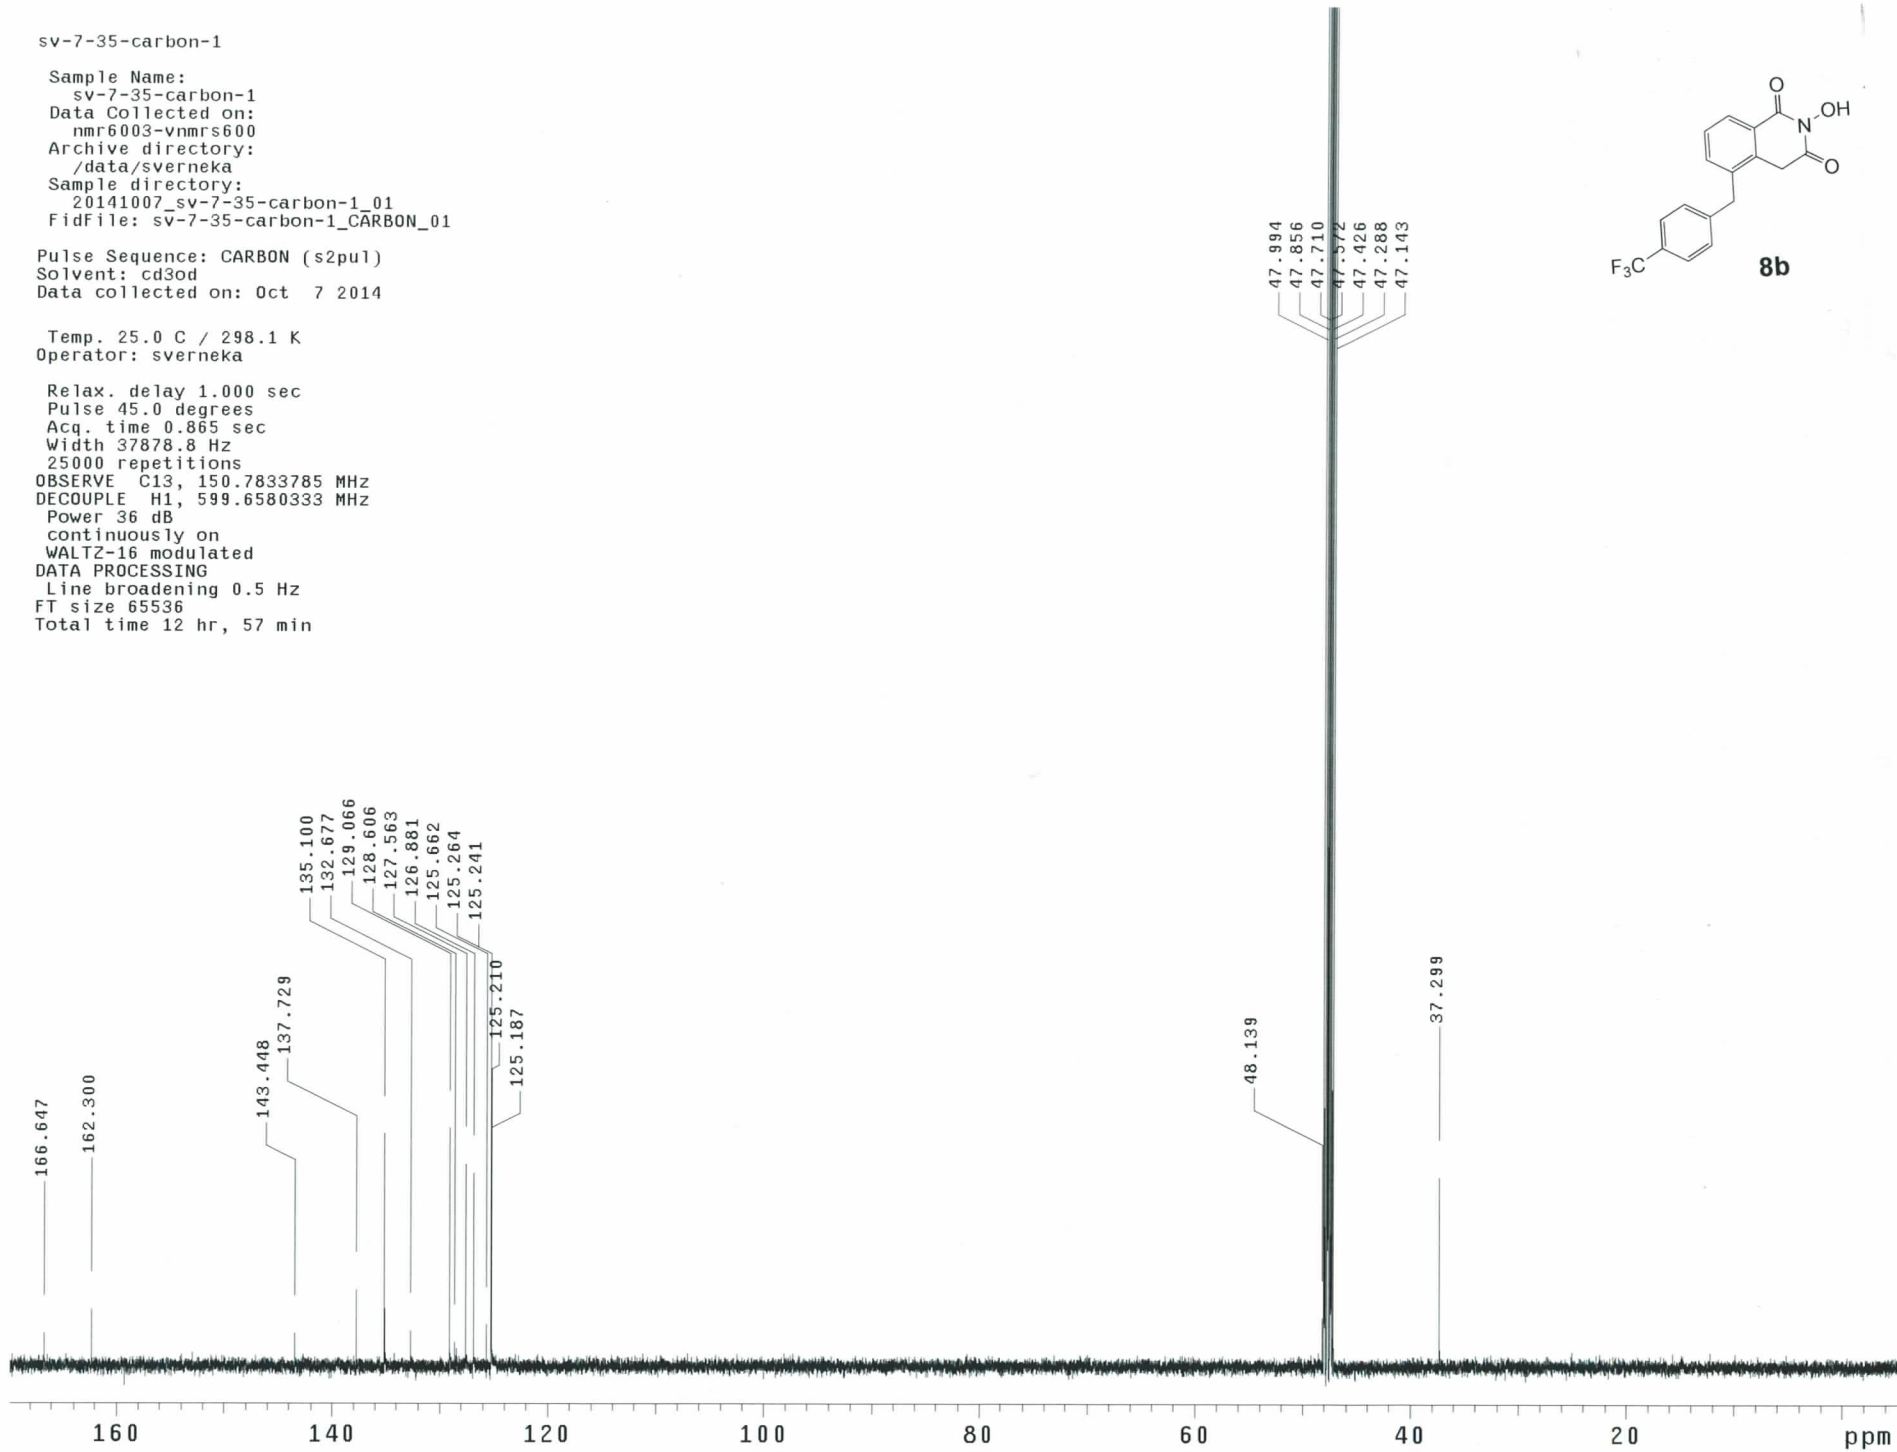

sv-7-51-carbon

Sample Name:  
sv-7-51-carbon  
Data Collected on:  
nmr6003-vnmrs600  
Archive directory:  
/data/sverneka  
Sample directory:  
20140923\_sv-7-51-carbon\_01  
FidFile: sv-7-51-carbon\_PROTON\_01

Pulse Sequence: PROTON (s2pu1)  
Solvent: dms0  
Data collected on: Sep 23 2014

Temp. 25.0 C / 298.1 K  
Operator: sverneka

Relax. delay 1.000 sec  
Pulse 45.0 degrees  
Acq. time 1.704 sec  
Width 9615.4 Hz  
32 repetitions  
OBSERVE H1, 599.655207 MHz  
DATA PROCESSING  
FT size 32768  
Total time 1 min 27 sec

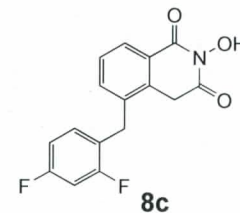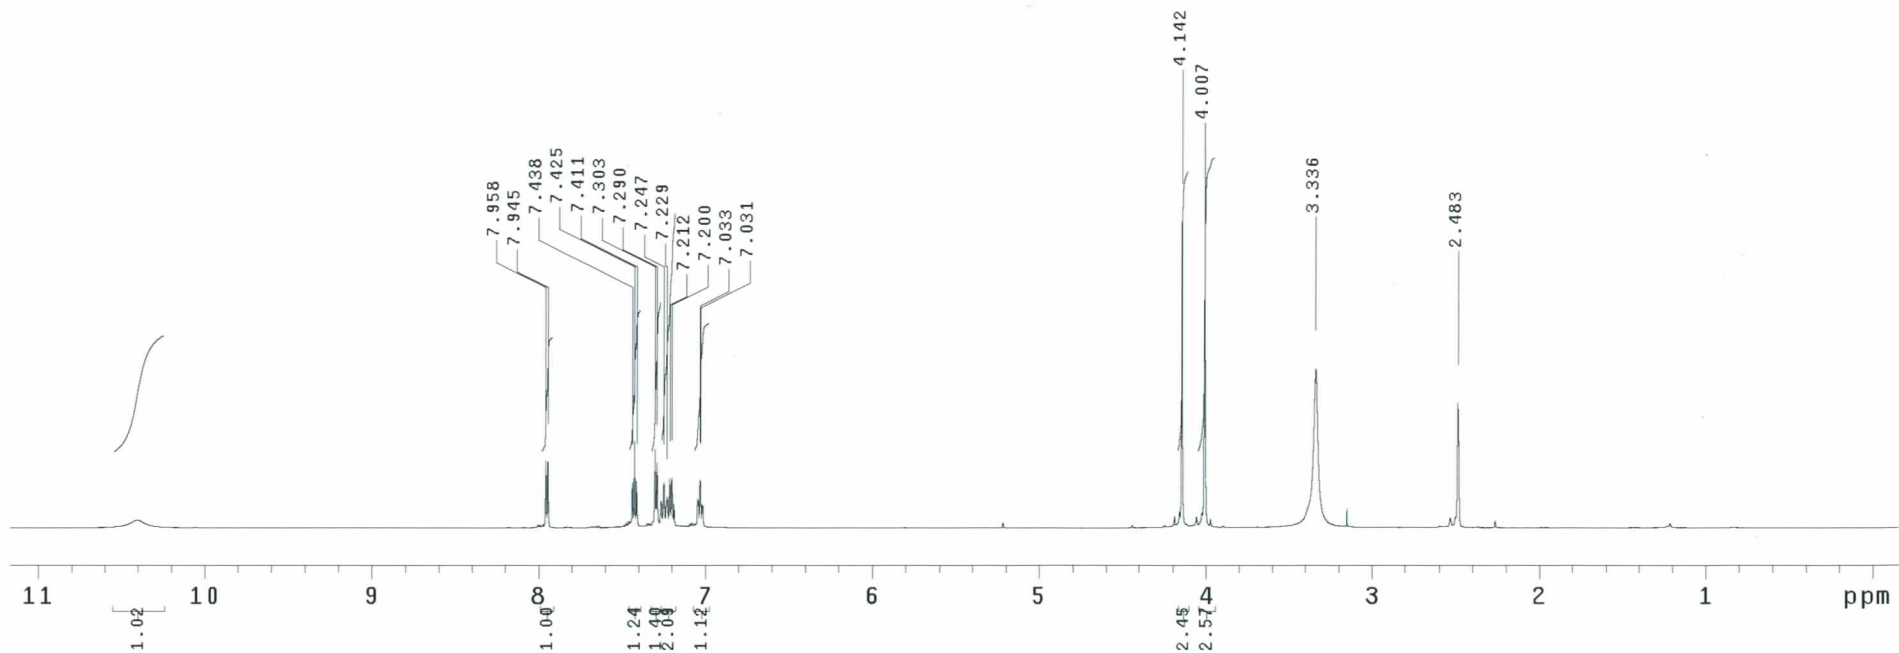

sv-7-51-carbon

Sample Name:  
sv-7-51-carbon  
Data Collected on:  
nmr6003-vnmrs600  
Archive directory:  
/data/sverneka  
Sample directory:  
20140923\_sv-7-51-carbon\_01  
FidFile: sv-7-51-carbon\_CARBON\_01

Pulse Sequence: CARBON (s2pu1)  
Solvent: dmsd  
Data collected on: Sep 23 2014

Temp. 25.0 C / 298.1 K  
Operator: sverneka

Relax. delay 1.000 sec  
Pulse 45.0 degrees  
Acq. time 0.865 sec  
Width 37878.8 Hz  
23000 repetitions  
OBSERVE C13, 150.7835006 MHz  
DECOUPLE H1, 599.6585190 MHz  
Power 36 dB  
continuously on  
WALTZ-16 modulated  
DATA PROCESSING  
Line broadening 0.5 Hz  
FT size 65536  
Total time 11 hr, 55 min

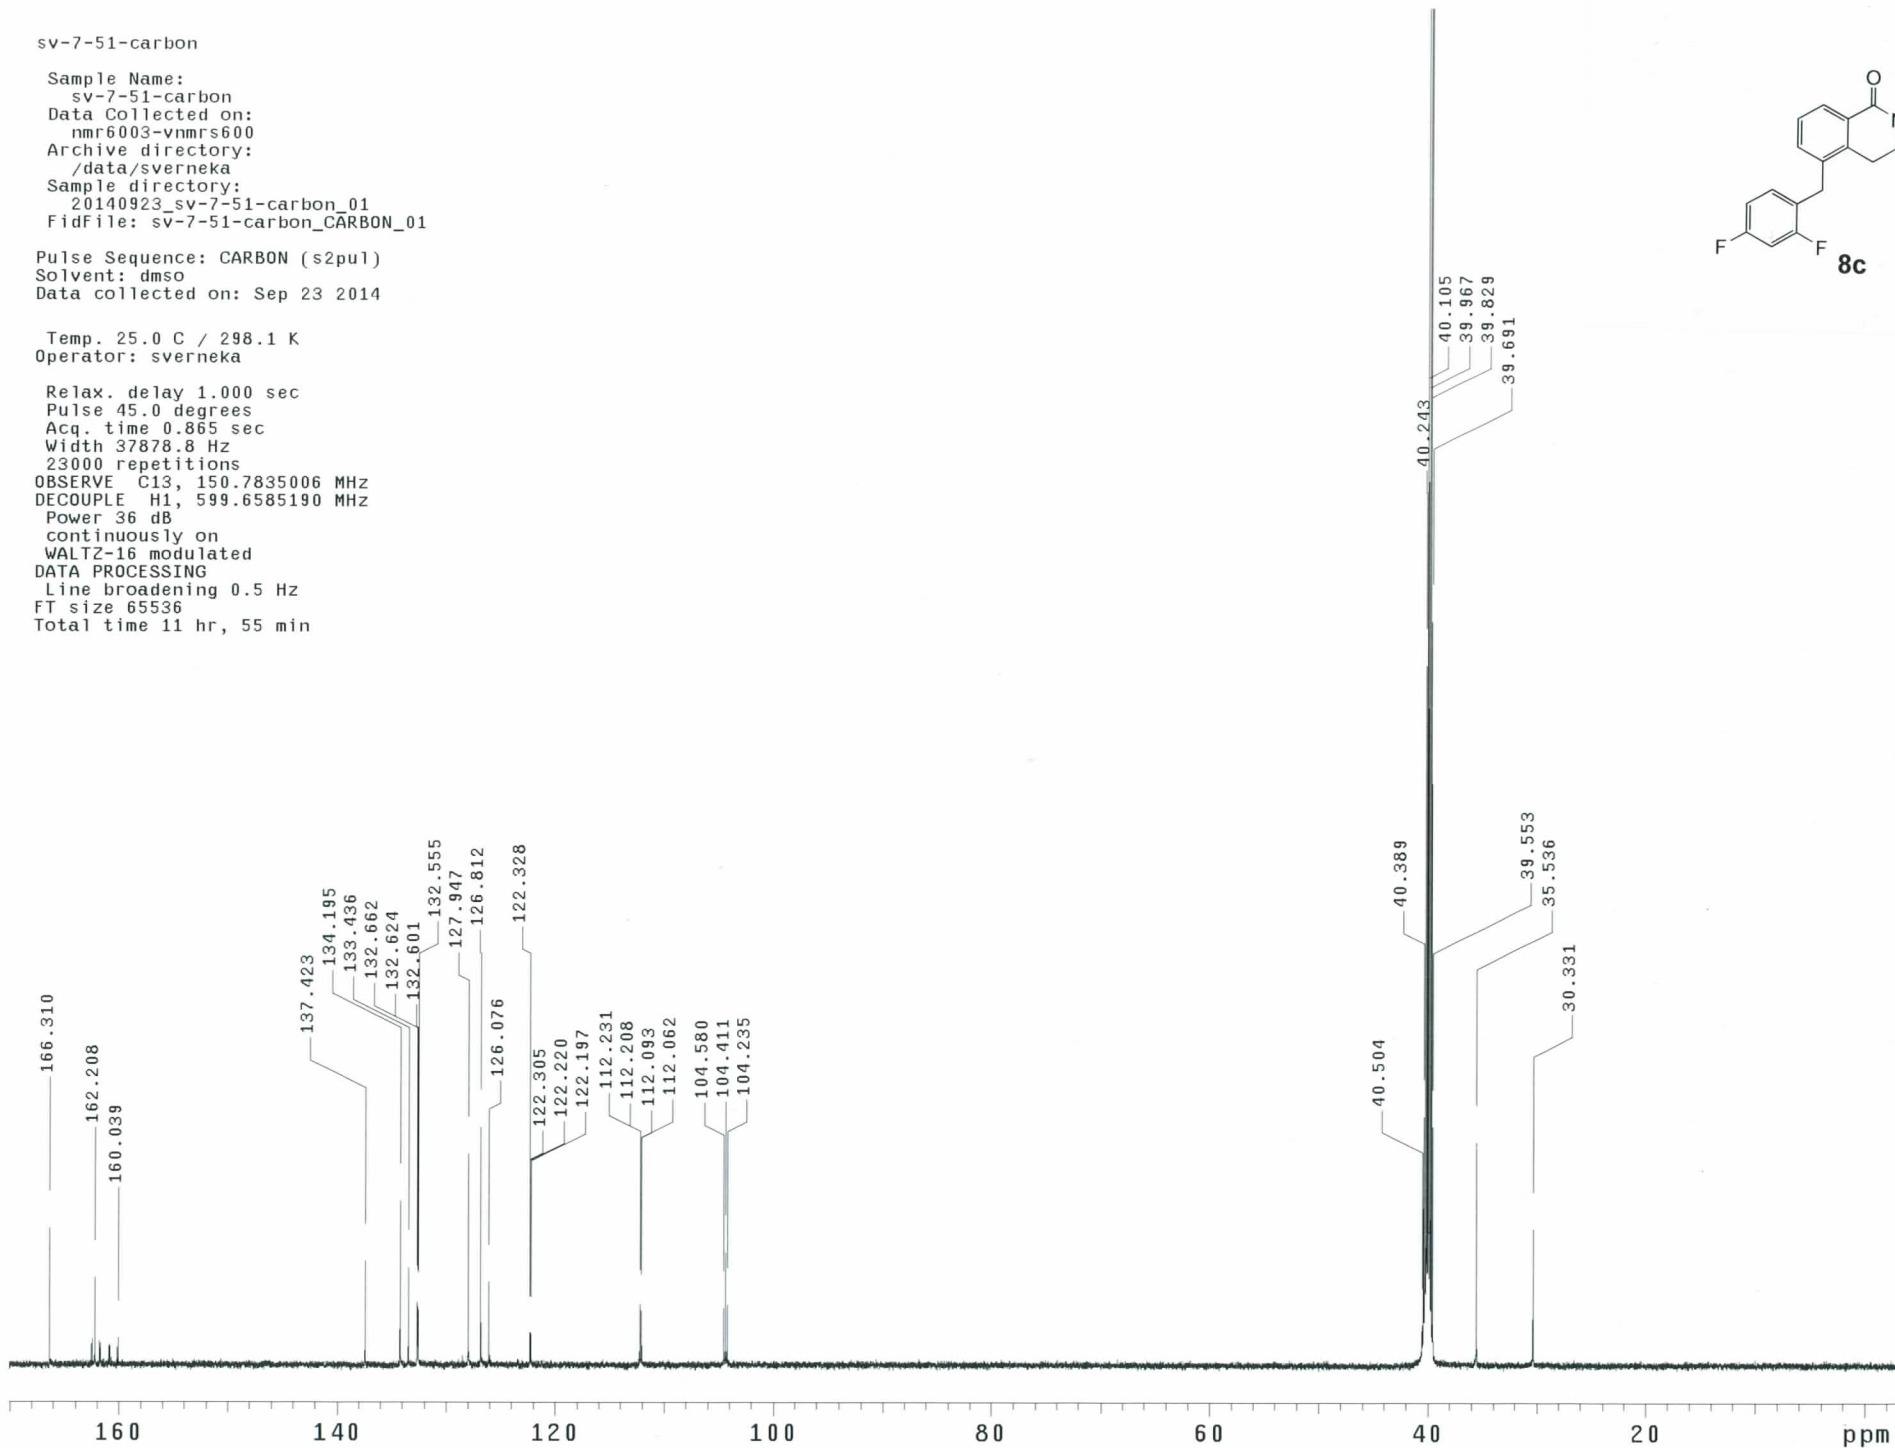



sv-7-95-carbon

Sample Name:  
sv-7-95-carbon  
Data Collected on:  
nmr6003-vnmrs600  
Archive directory:  
/data/sverneka  
Sample directory:  
20141008\_sv-7-95-carbon\_01  
FidFile: sv-7-95-carbon\_PROTON\_01

Pulse Sequence: PROTON (s2pu1)  
Solvent: dmsd  
Data collected on: Oct 8 2014

Temp. 25.0 C / 298.1 K  
Operator: sverneka

Relax. delay 1.000 sec  
Pulse 45.0 degrees  
Acq. time 1.704 sec  
Width 9615.4 Hz  
32 repetitions  
OBSERVE H1, 599.655207 MHz  
DATA PROCESSING  
FT size 32768  
Total time 1 min 27 sec

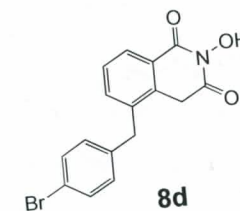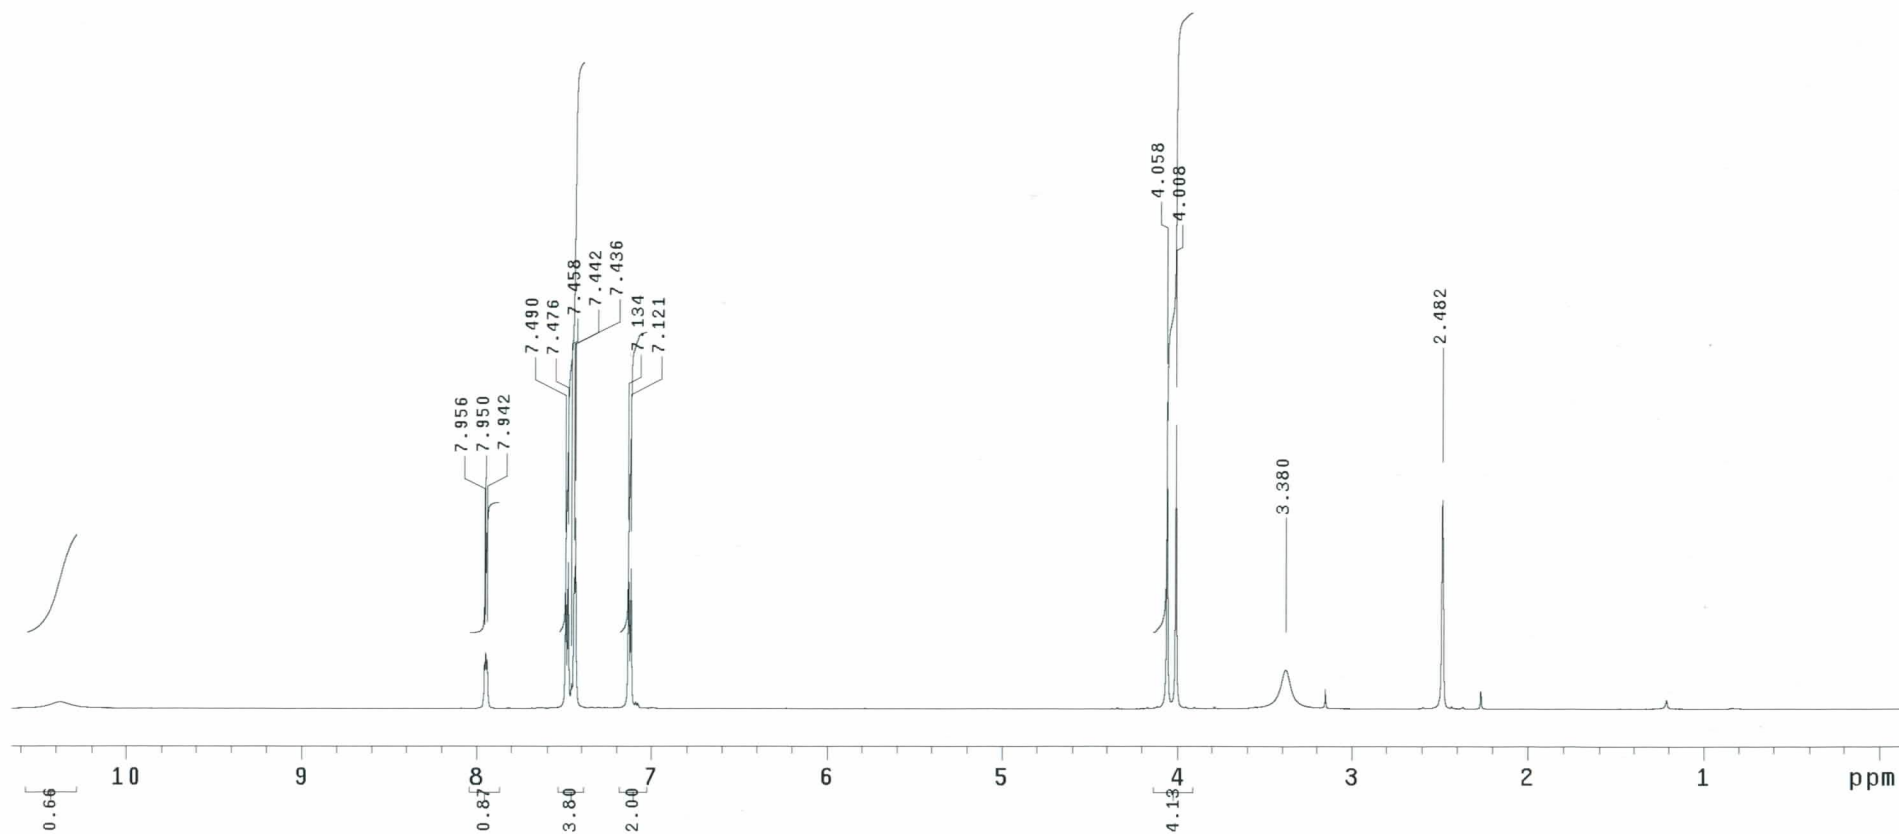

sv-7-95-carbon

Sample Name:  
sv-7-95-carbon  
Data Collected on:  
nmr6003-vnmrs600  
Archive directory:  
/data/sverneka  
Sample directory:  
20141008\_sv-7-95-carbon\_01  
FidFile: sv-7-95-carbon\_CARBO\_01

Pulse Sequence: CARBON (s2pu1)  
Solvent: dms  
Data collected on: Oct 8 2014

Temp. 25.0 C / 298.1 K  
Operator: sverneka

Relax. delay 1.000 sec  
Pulse 45.0 degrees  
Acq. time 0.865 sec  
Width 37878.8 Hz  
25000 repetitions  
OBSERVE C13, 150.7835006 MHz  
DECOUPLE H1, 599.6585190 MHz  
Power 36 dB  
continuously on  
WALTZ-16 modulated  
DATA PROCESSING  
Line broadening 0.5 Hz  
FT size 65536  
Total time 12 hr, 57 min

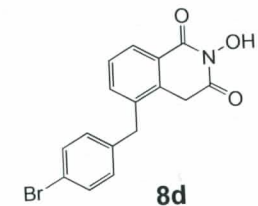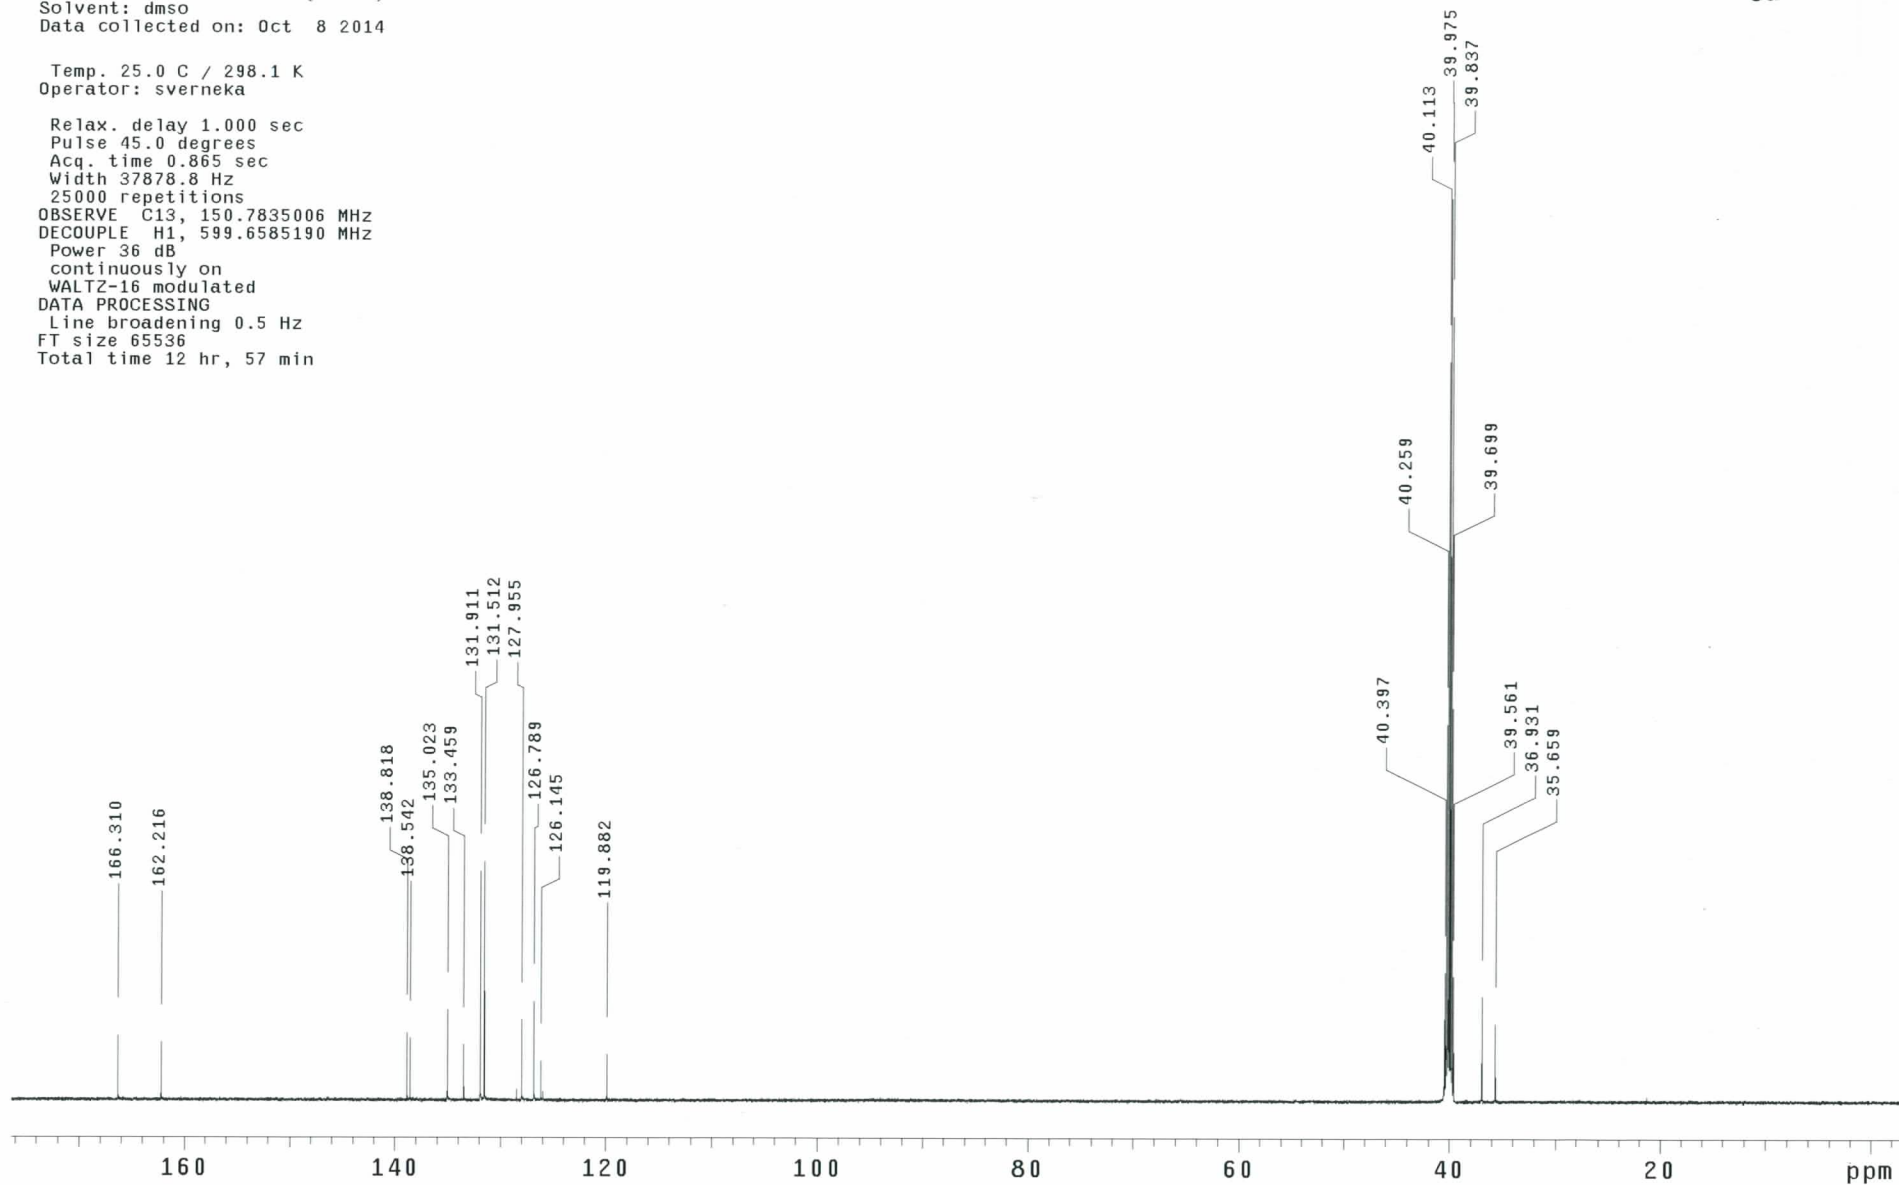

jt-6-7

Sample Name:

jt-6-7

Data Collected on:

nmr6003-vnmrs600

Archive directory:

/data/tangx252

Sample directory:

20150526\_jt-6-7\_01

FidFile: jt-6-7\_PROTON\_01

Pulse Sequence: PROTON (s2pul)

Solvent: cd3od

Data collected on: May 26 2015

Temp. 25.0 C / 298.1 K

Operator: tangx252

Relax. delay 1.000 sec

Pulse 45.0 degrees

Acq. time 1.704 sec

Width 9615.4 Hz

8 repetitions

OBSERVE H1, 599.6550350 MHz

DATA PROCESSING

FT size 32768

Total time 0 min 22 sec

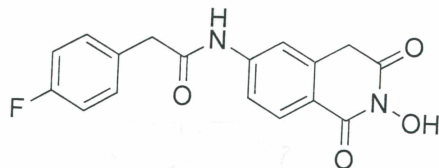

9a

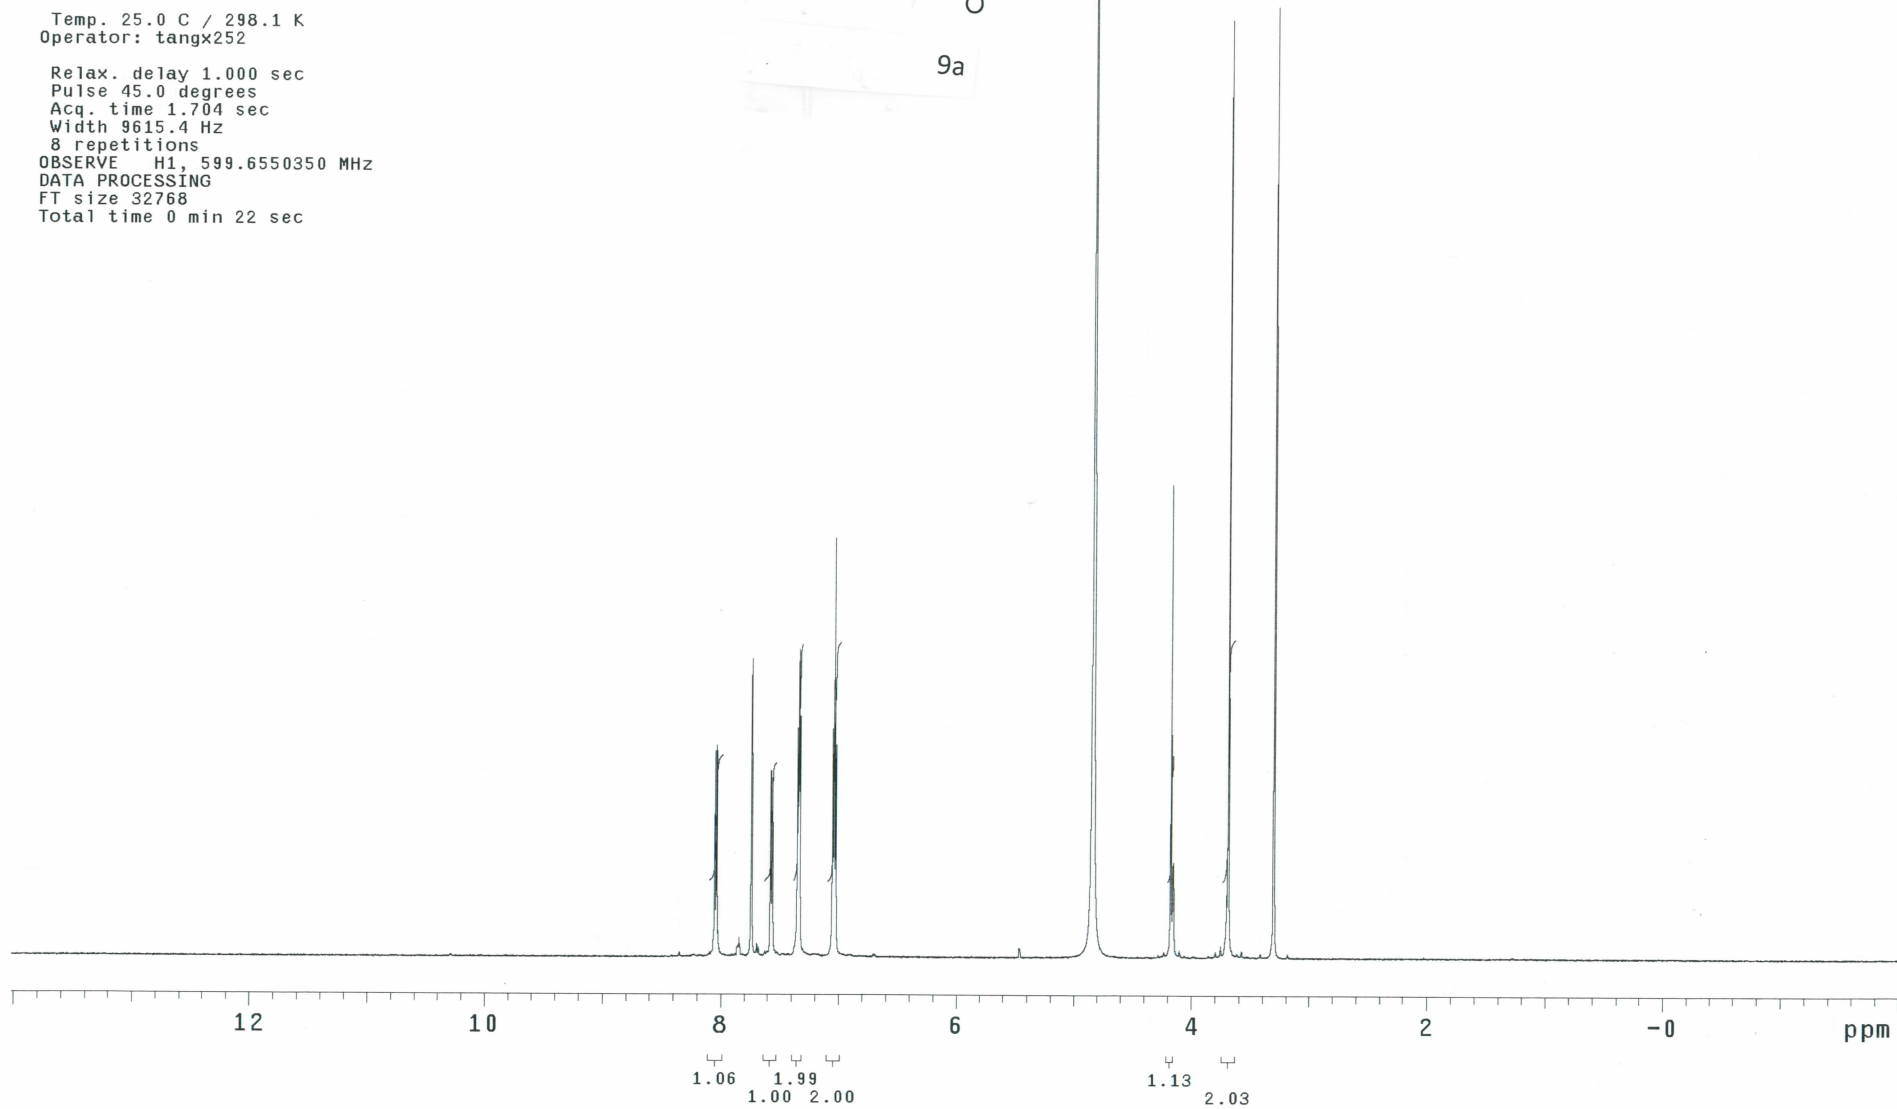

jt-6-7-13C

Sample Name:  
jt-6-7-13C  
Data Collected on:  
nmr6003-vnmrs600  
Archive directory:  
/data/tangx252  
Sample directory:  
20160721\_jt-6-7-13C\_02  
FidFile: CARBON

9a

Pulse Sequence: CARBON (s2pu1)  
Solvent: dmsd  
Data collected on: Jul 21 2016

Temp. 25.0 C / 298.1 K  
Operator: tangx252

Relax. delay 1.000 sec  
Pulse 45.0 degrees  
Acq. time 0.865 sec  
Width 37878.8 Hz  
1344 repetitions  
OBSERVE C13, 150.7818626 MHz  
DECOUPLE H1, 599.6520046 MHz  
Power 36 dB  
continuously on  
WALTZ-16 modulated  
DATA PROCESSING  
Line broadening 0.5 Hz  
FT size 65536  
Total time 1 hr, 2 min

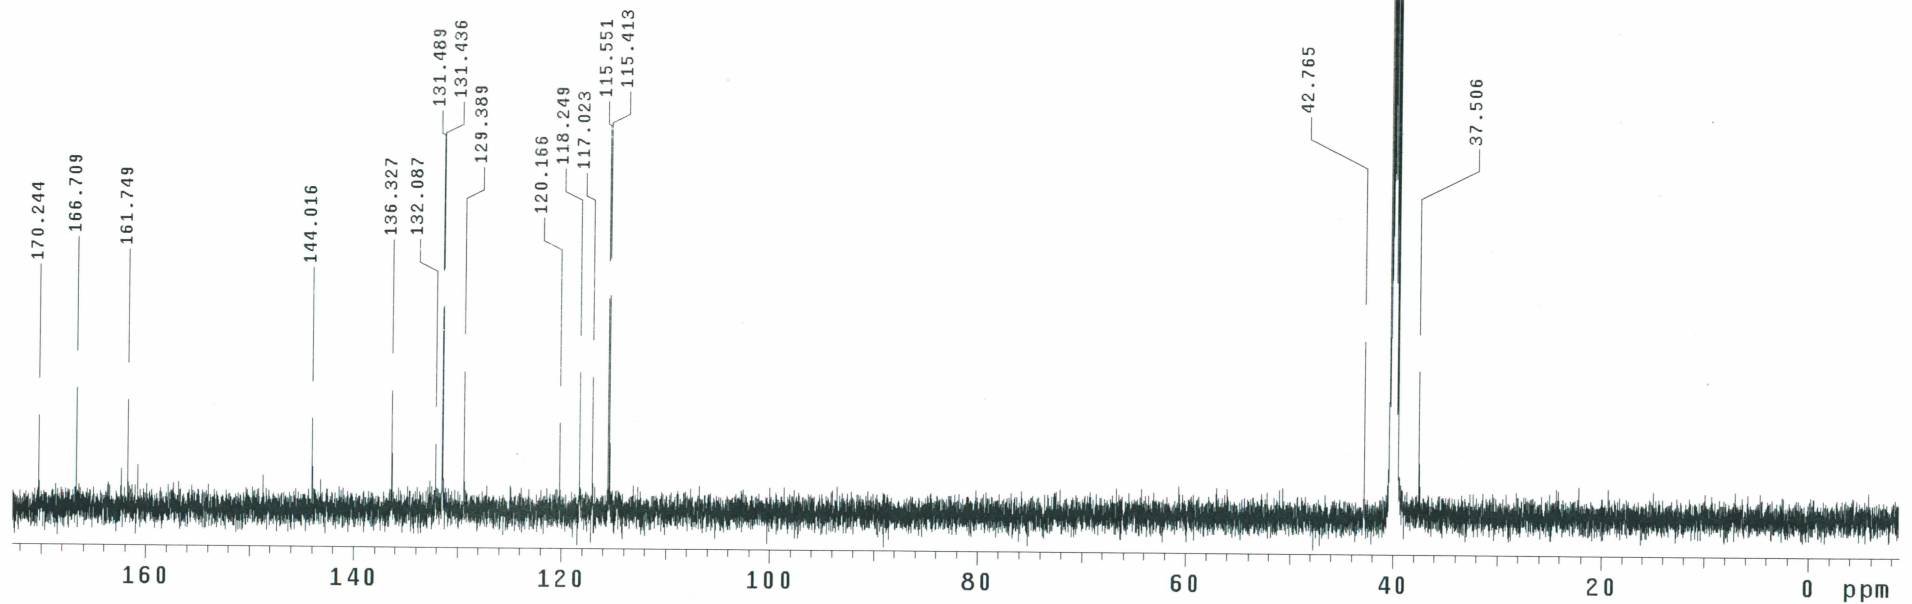

jt-6-11

Sample Name:  
jt-6-11  
Data Collected on:  
nmr6003-vnmrs600  
Archive directory:  
/data/tangx252  
Sample directory:  
20110525\_jt-6-11\_01  
FidFile: jt-6-11\_PROTON\_01

Pulse Sequence: PROTON (s2pu1)  
Solvent: cd3od  
Data collected on: May 25 2011

Temp. 25.0 C / 298.1 K  
Operator: tangx252

Relax. delay 1.000 sec  
Pulse 45.0 degrees  
Acq. time 1.704 sec  
Width 9615.4 Hz  
32 repetitions  
OBSERVE H1, 599.6811318 MHz  
DATA PROCESSING  
FT size 32768  
Total time 1 min 27 sec

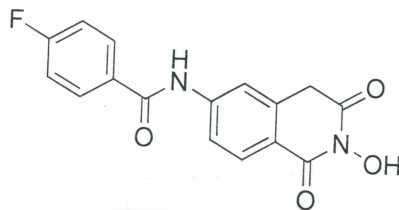

9b

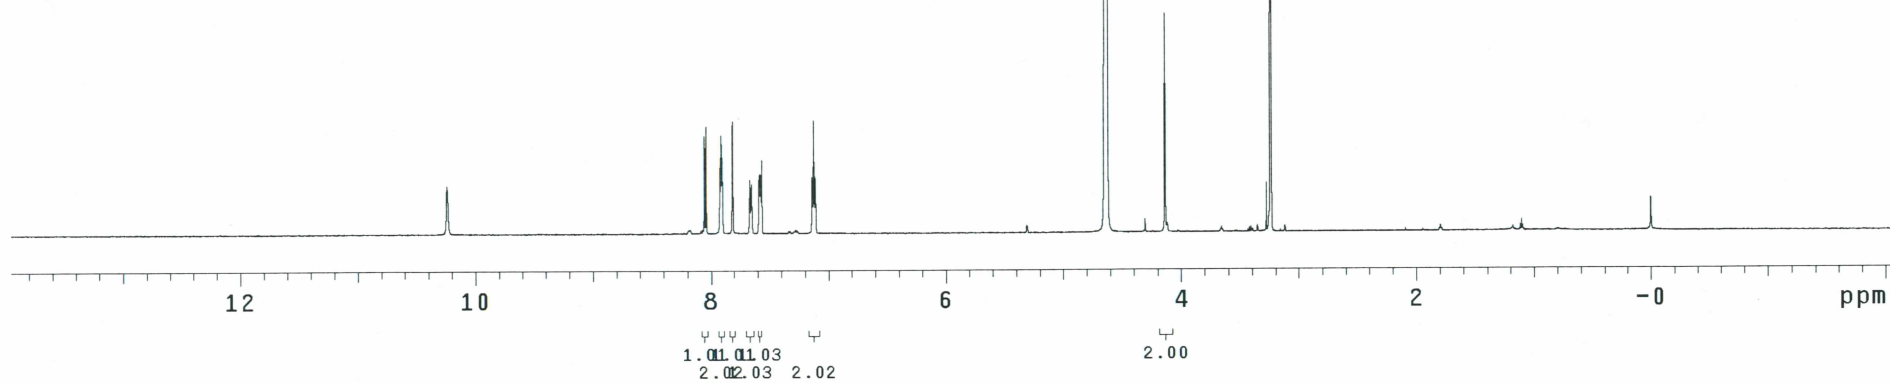

jt-6-11-13C

Sample Name:  
jt-6-11-13C  
Data Collected on:  
nmr6003-vnmrs600  
Archive directory:  
/data/tangx252  
Sample directory:  
20160722\_jt-6-11-13C\_01  
FidFile: JT-6-11-13C

Pulse Sequence: CARBON (s2pu1)  
Solvent: dmsd  
Data collected on: Jul 22 2016

Temp. 25.0 C / 298.1 K  
Operator: tangx252

Relax. delay 1.000 sec  
Pulse 45.0 degrees  
Acq. time 0.865 sec  
Width 37878.8 Hz  
2624 repetitions  
OBSERVE C13, 150.7818626 MHZ  
DECOUPLE H1, 599.6520046 MHZ  
Power 36 dB  
continuously on  
WALTZ-16 modulated  
DATA PROCESSING  
Line broadening 0.5 Hz  
FT size 65536  
Total time 2 hr, 35 min

9b

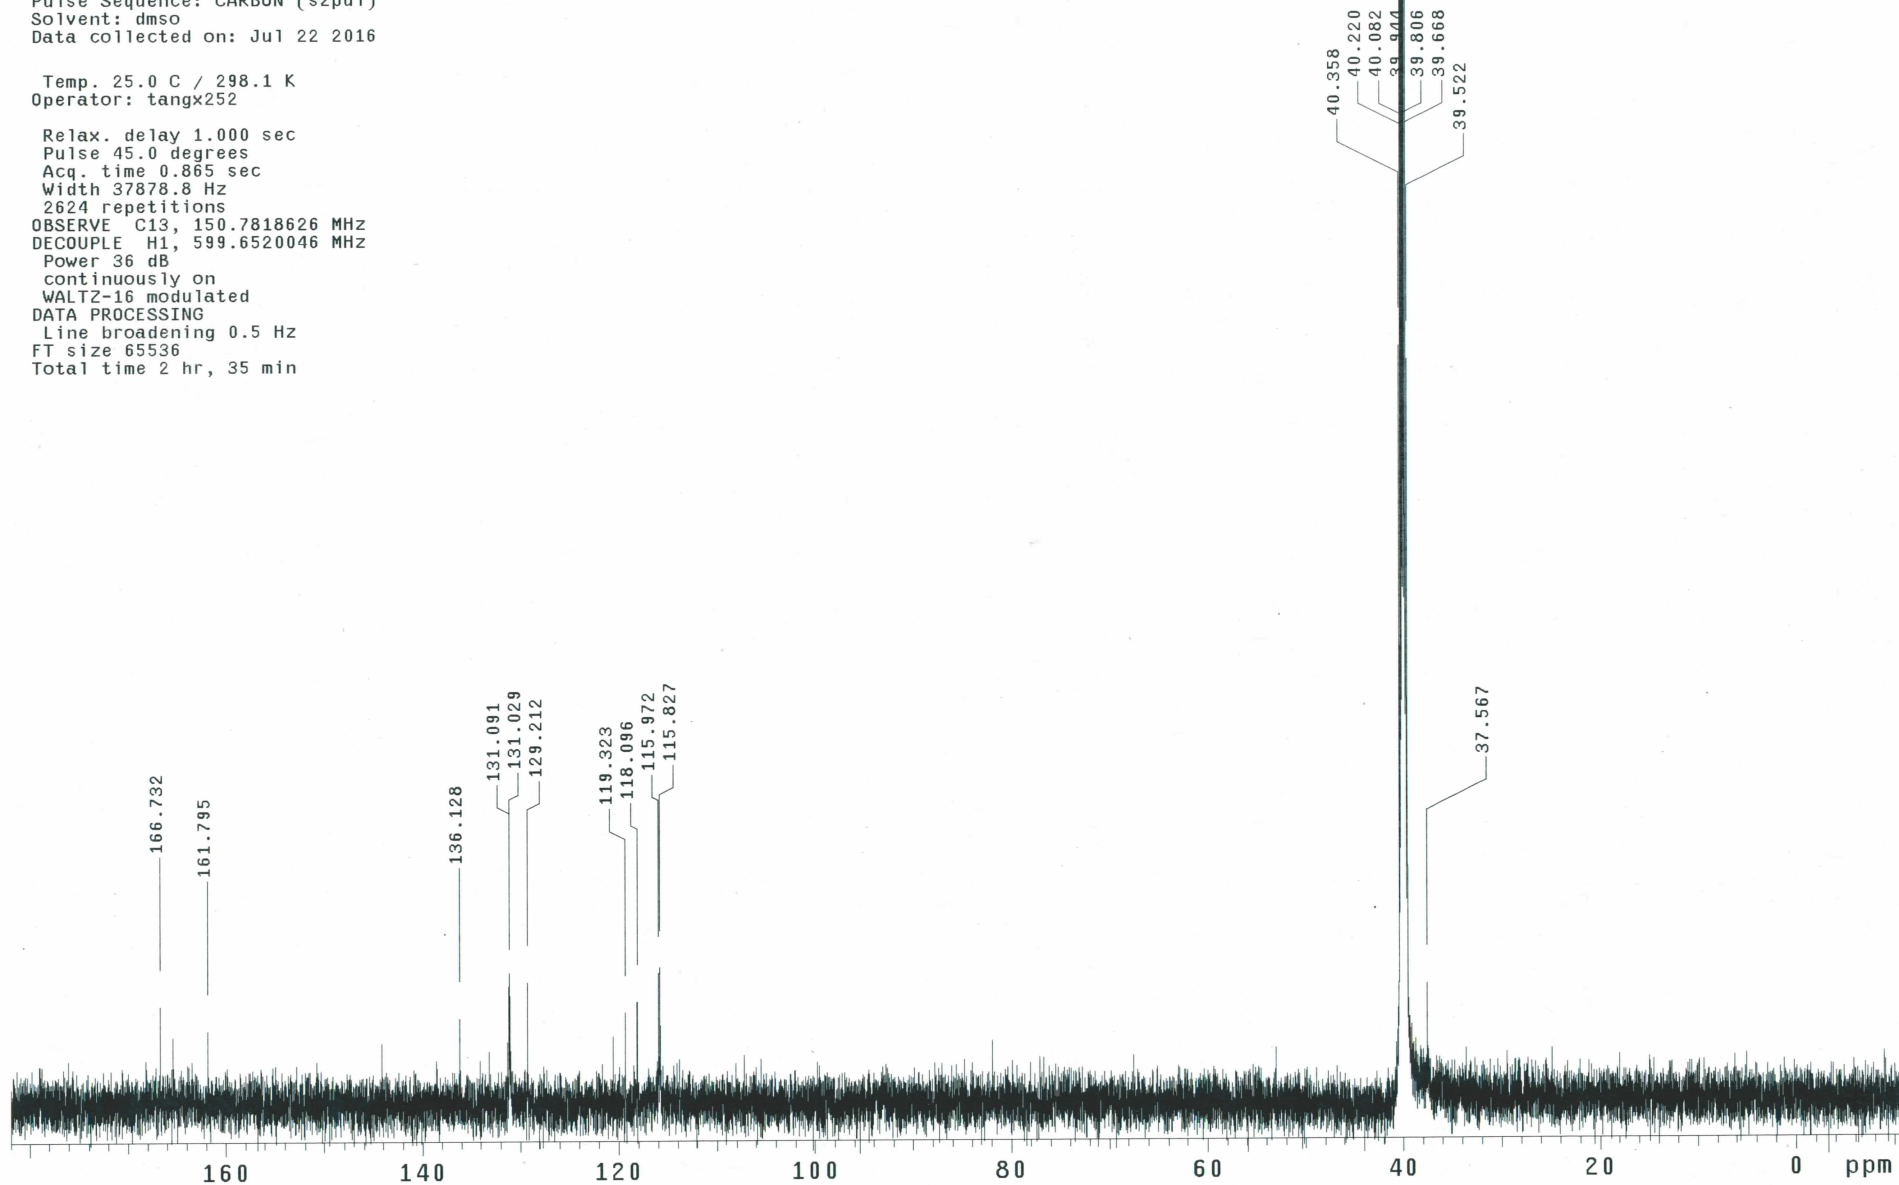

jt-6-19

Sample Name:  
jt-6-19  
Data Collected on:  
nmr6003-vnmrs600  
Archive directory:  
/data/tangx252  
Sample directory:  
20110525\_jt-6-19\_02  
FidFile: jt-6-19\_PROTON\_01

Pulse Sequence: PROTON (s2pu1)  
Solvent: cd3od  
Data collected on: May 25 2011

Temp. 25.0 C / 298.1 K  
Operator: tangx252

Relax. delay 1.000 sec  
Pulse 45.0 degrees  
Acq. time 1.704 sec  
Width 9615.4 Hz  
32 repetitions  
OBSERVE H1, 599.6811465 MHz  
DATA PROCESSING  
FT size 32768  
Total time 1 min 27 sec

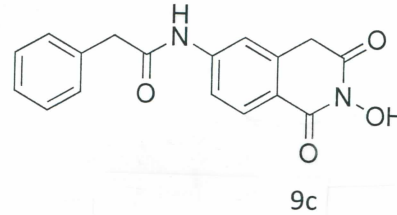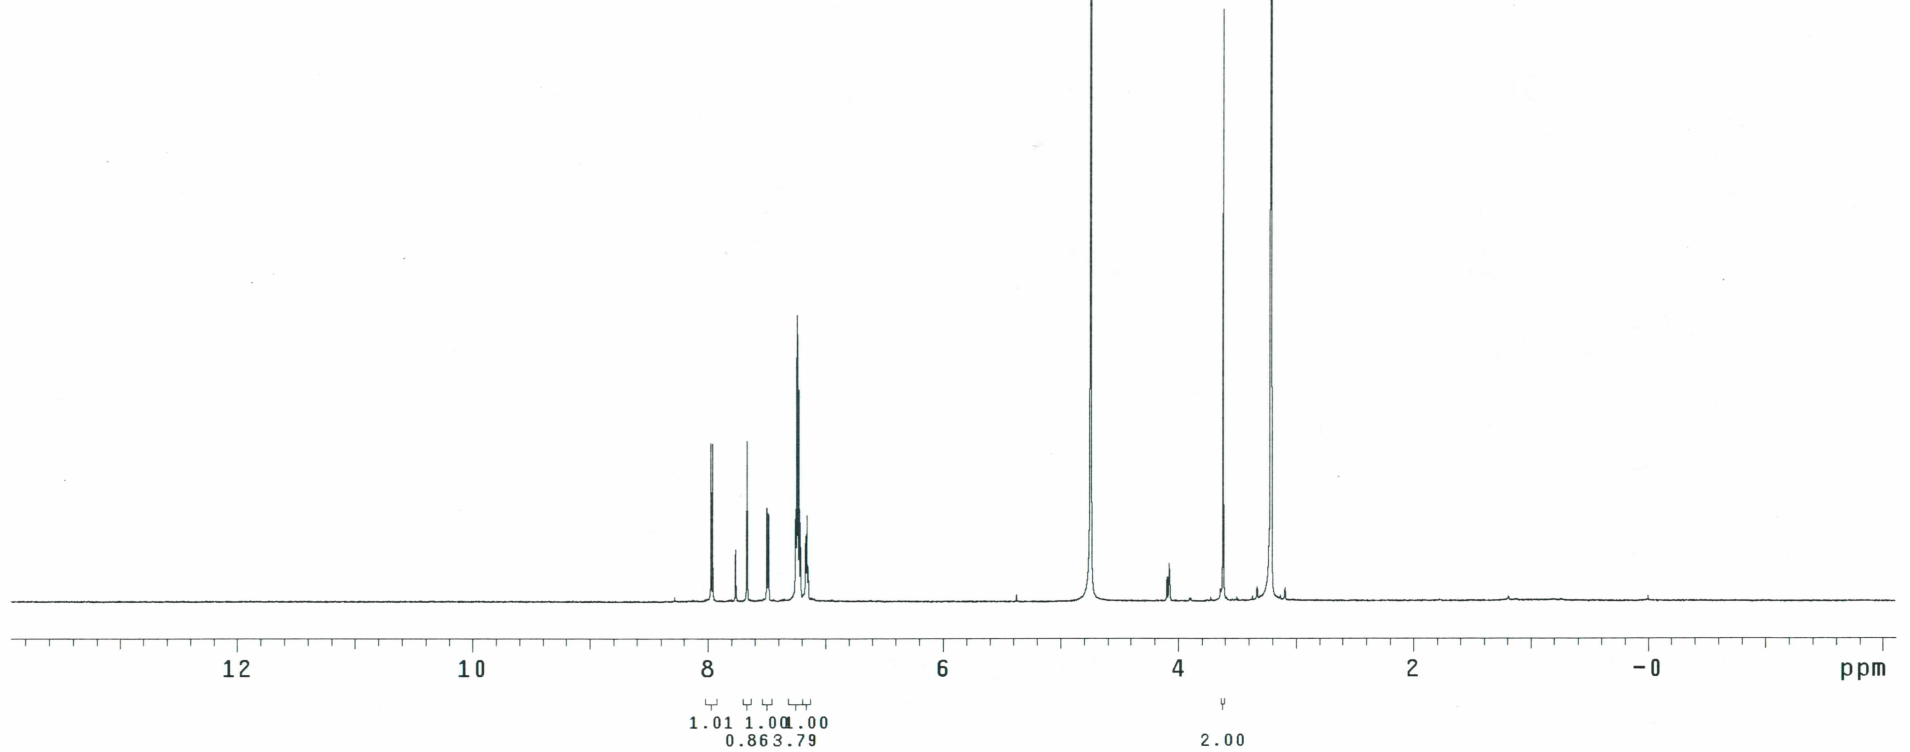

Jt-6-19-13C

Sample Name:  
Jt-6-19-13C  
Data Collected on:  
nmr6003-vnmrs600  
Archive directory:  
/data/tangx252  
Sample directory:  
20160721\_Jt-6-19-13C\_01  
FidFile: Jt-6-19-13C\_CARBON\_01

Pulse Sequence: CARBON (s2pu1)  
Solvent: dms  
Data collected on: Jul 21 2016

Temp. 25.0 C / 298.1 K  
Operator: tangx252

Relax. delay 1.000 sec  
Pulse 45.0 degrees  
Acq. time 0.865 sec  
Width 37878.8 Hz  
2000 repetitions  
OBSERVE C13, 150.7818626 MHz  
DECOUPLE H1, 599.6520046 MHz  
Power 36 dB  
continuously on  
WALTZ-16 modulated  
DATA PROCESSING  
Line broadening 0.5 Hz  
FT size 65536  
Total time 1 hr, 2 min

9c

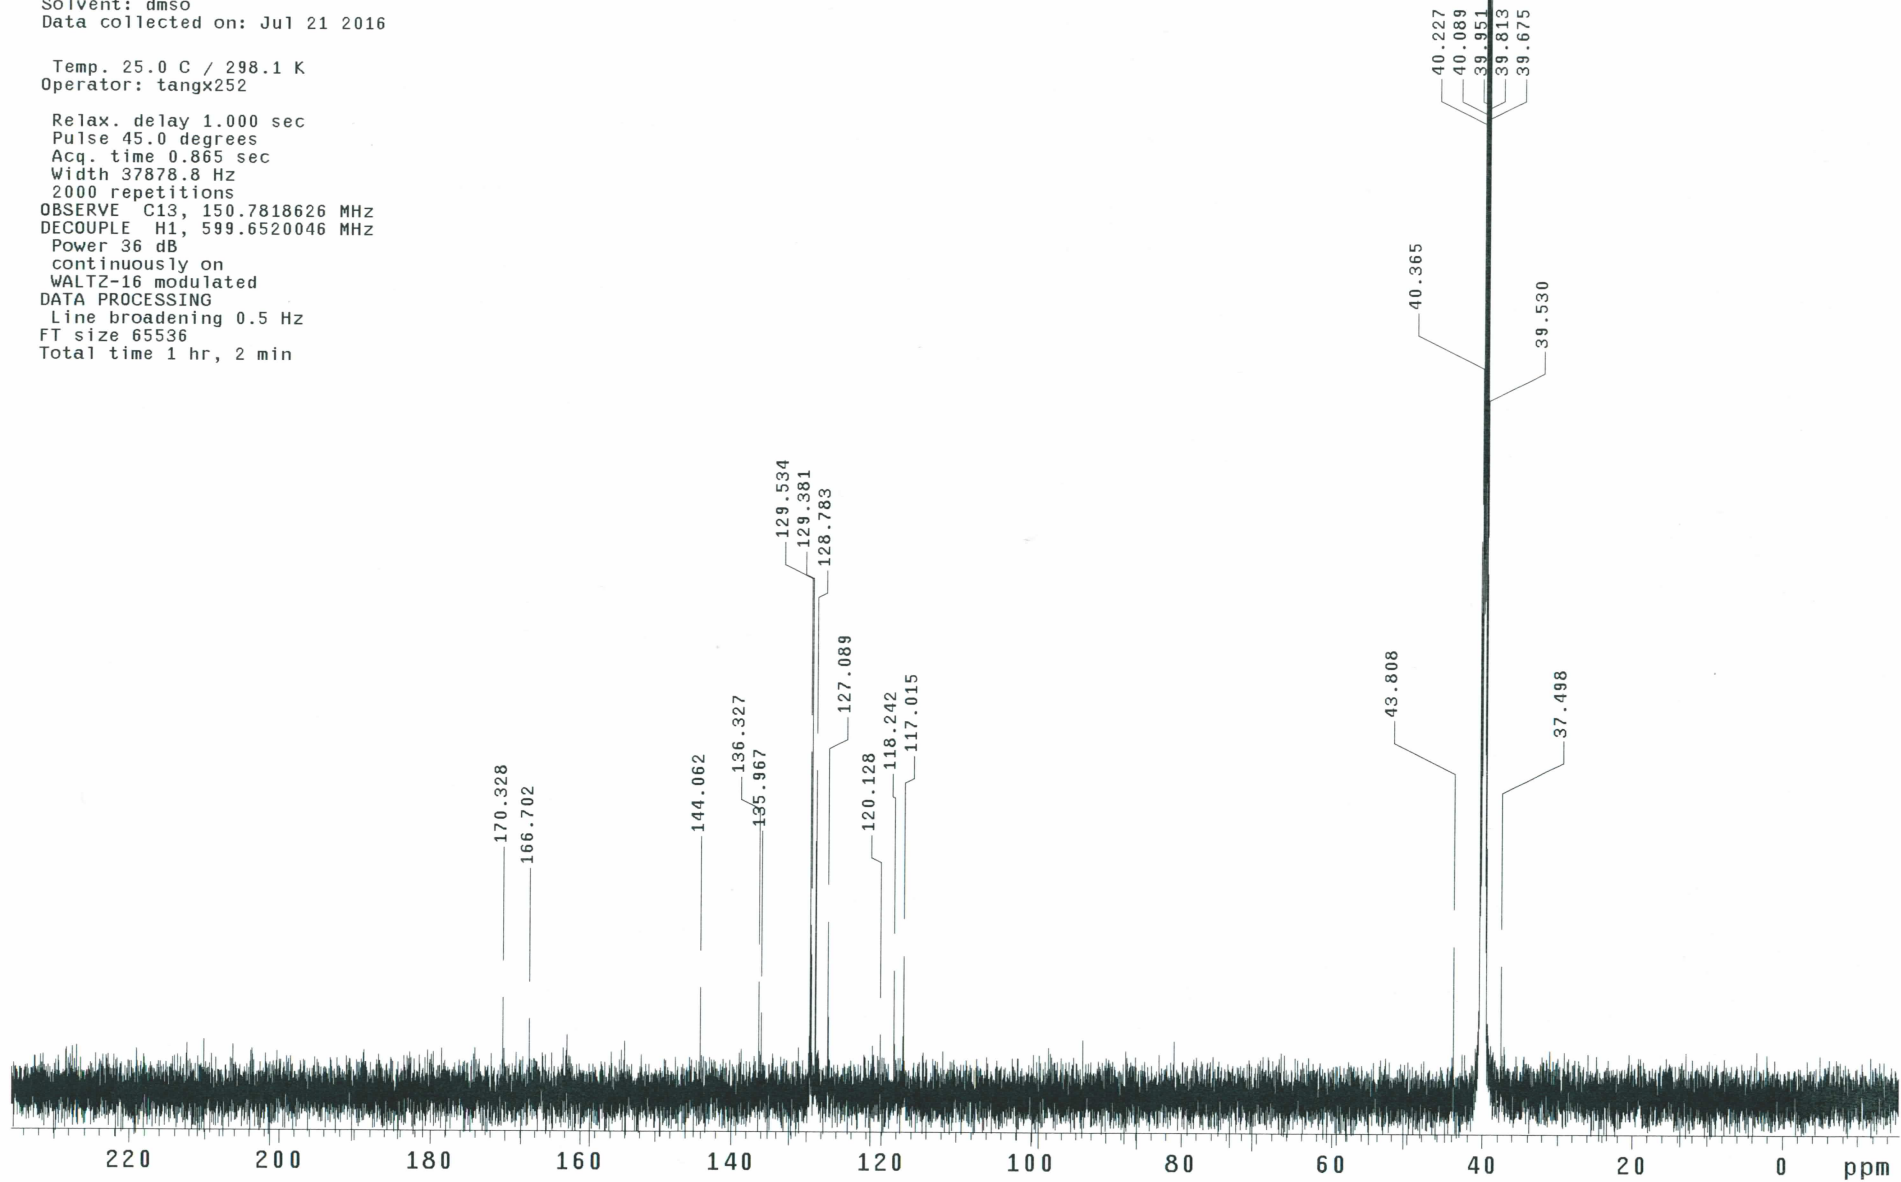



jt-6-27

Sample Name:

jt-6-27

Data Collected on:

nmr6003-vnmrs600

Archive directory:

/data/tangx252

Sample directory:

20110526\_jt-6-27\_01

FidFile: jt-6-27\_PROTON\_01

Pulse Sequence: PROTON (s2pu1)

Solvent: cd3od

Data collected on: May 26 2011

Temp. 25.0 C / 298.1 K

Operator: tangx252

Relax. delay 1.000 sec

Pulse 45.0 degrees

Acq. time 1.704 sec

Width 9615.4 Hz

32 repetitions

OBSERVE H1, 599.6809264 MHz

DATA PROCESSING

FT size 32768

Total time 1 min 27 sec

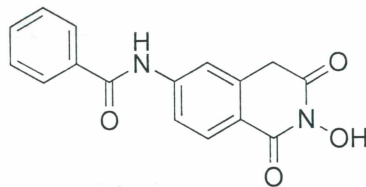

9d

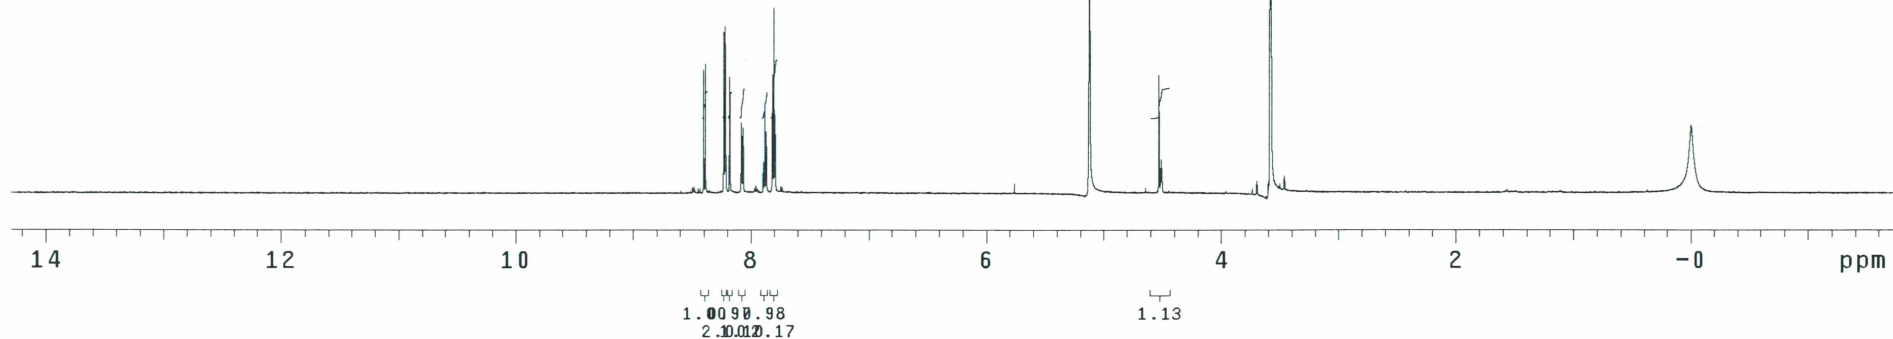

jt-6-27-13C

Sample Name:  
jt-6-27-13C  
Data Collected on:  
nmr6003-vnmrs600  
Archive directory:  
/data/tangx252  
Sample directory:  
20160722\_jt-6-27-13C\_01  
FidFile: jt-6-27-13C\_CARBON\_01

9d

Pulse Sequence: CARBON (s2pu1)  
Solvent: dmsd  
Data collected on: Jul 22 2016

Temp. 25.0 C / 298.1 K  
Operator: tangx252

Relax. delay 1.000 sec  
Pulse 45.0 degrees  
Acq. time 0.865 sec  
Width 37878.8 Hz  
2000 repetitions  
OBSERVE C13, 150.7818626 MHz  
DECOUPLE H1, 599.6520046 MHz  
Power 36 dB  
continuously on  
WALTZ-16 modulated  
DATA PROCESSING  
Line broadening 0.5 Hz  
FT size 65536  
Total time 1 hr, 2 min

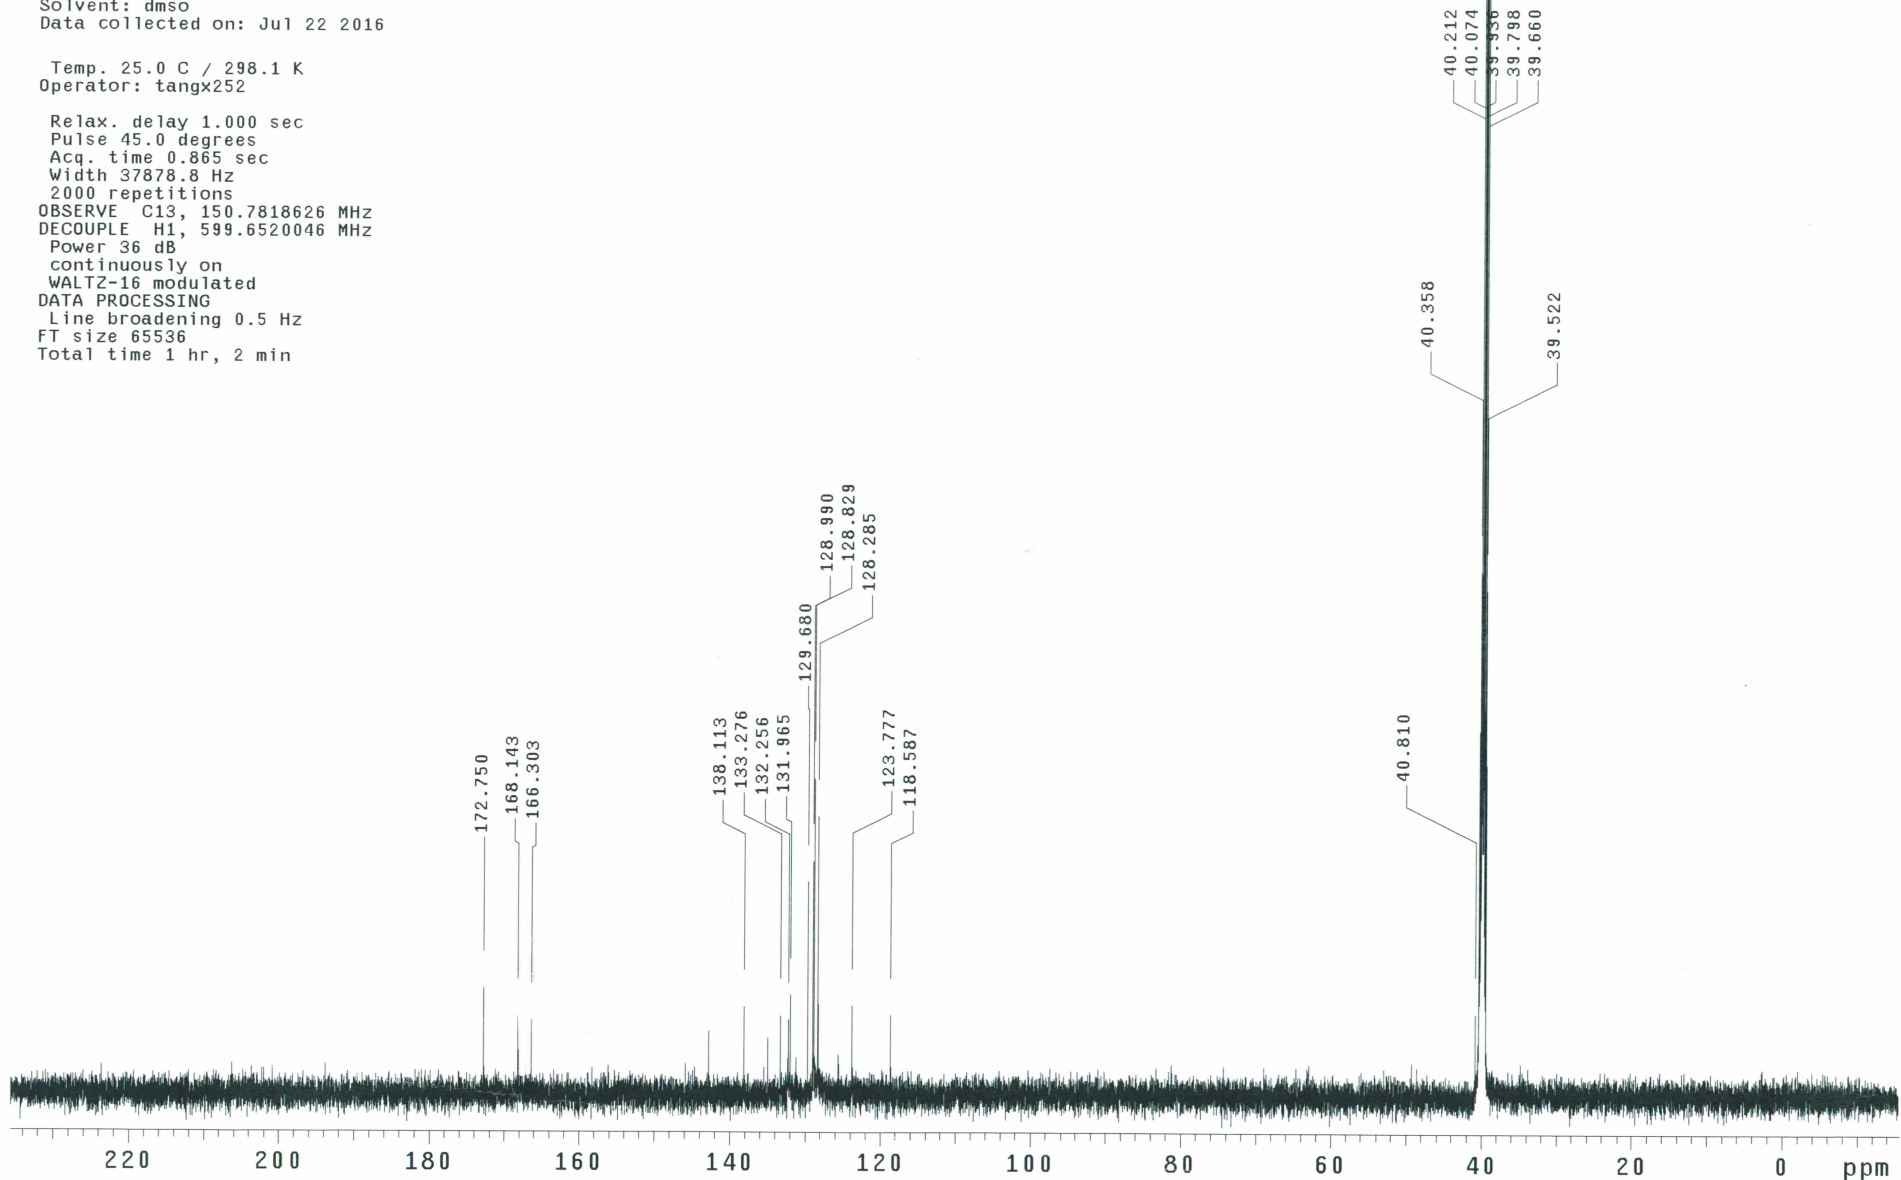

Supplement: NIHMS878353-supplement-Suppl.pdf [file NIHMS878353-supplement-Suppl.pdf]
